# Supplementary material for: Targeting CDK4 overcomes EMT-mediated tumor heterogeneity and therapeutic resistance in KRAS-mutant lung cancer
Source: PubMed Central journal article supplement (PMC8492319; doi:10.1172/jci.insight.148392), 2021-09-08
Supplement: jciinsight-6-148392-s277.pdf [file jciinsight-6-148392-s277.pdf]

## **Targeting CDK4 overcomes EMT-mediated tumor heterogeneity and therapeutic resistance in KRAS mutant lung cancer**

Aparna Padhye<sup>1,2</sup>, Jessica M. Konen<sup>1</sup>, B. Leticia Rodriguez<sup>1</sup>, Jared J. Fradette<sup>1</sup>, Joshua K. Ochieng<sup>1</sup>, Lixia Diao<sup>3</sup>, Jing Wang<sup>3</sup>, Wei Lu<sup>4</sup>, Luisa S. Solis<sup>4</sup>, Harsh Batra<sup>4</sup>, Maria G. Raso<sup>4</sup>, Michael D. Peoples<sup>5</sup>, Rosalba Minelli<sup>5</sup>, Alessandro Carugo<sup>5</sup>, Christopher A. Bristow<sup>5</sup>, Don L. Gibbons<sup>1,6\*</sup>

1. Department of Thoracic/Head and Neck Medical Oncology, University of Texas MD Anderson Cancer Center, Houston, TX 77030, USA.
2. University of Texas Graduate School of Biomedical Sciences, Houston, TX 77030, USA.
3. Department of Bioinformatics and Computational Biology, University of Texas MD Anderson Cancer Center, Houston, TX 77030, USA.
4. Department of Translational Molecular Pathology, University of Texas MD Anderson Cancer Center, Houston, TX 77030, USA
5. TRACTION Platform, Division of Therapeutics Development, University of Texas MD Anderson Cancer Center, Houston, TX 77030, USA.
6. Department of Molecular and Cellular Oncology, University of Texas MD Anderson Cancer Center, Houston, TX 77030, USA.

\*Corresponding author. Email: [dlgibbon@mdanderson.org](mailto:dlgibbon@mdanderson.org)

## Supplemental Methods

### *Plasmids, Transfections, and Lentiviral Generation and Transduction*

Transfections of si-RNAs were performed using the Lipofectamine 2000 Transfection Reagent (Thermo Fisher Scientific). Constitutive Cdkn1a overexpression cell lines were generated by using Cdkn1a mouse Tagged ORF Clone (Origene (NM\_007669)). Cdkn1a ORF was also subcloned into dox-inducible pTRIPZ-GFP vector to generate doxycycline inducible cell lines using EcoRI and AgeI restriction cut sites. Constitutive Cdkn1a shRNAs were purchased from Millipore sigma. The sequences used in the experiments are listed in table S11. Dox-inducible shRNAs were expressed in Tet-pLKO-puro vector with a scramble sequence as the non-targeting control. Tet-pLKO-puro was a gift from Dmitri Wiederschain (Addgene plasmid # 21915; <http://n2t.net/addgene:21915>; RRID: Addgene\_21915) (71). CDK4 and Cdkn1a shRNA oligo sequences that were used in the studies are listed in table S11. For lentiviral transductions, viruses were first generated by co-transfecting packaging vector psPAX2, envelope vector pMD2.G, and the pLenti-puro expression vector into 293T cells using Lipofectamine LTX. Transfection medium was removed and 293T cells were cultured in RPMI 1640 supplemented with FBS for 48 hours. Viruses were then syringe-filtered through a 0.45  $\mu\text{m}$  nylon filter and Polybrene (Santa Cruz) was added to a final concentration of 8  $\mu\text{g}/\text{mL}$ . Medium containing lentiviruses was then added to cells, left to allow infection of the cells for 48 hours, and replaced with fresh medium for further experiments.

### *Reverse Phase Protein Array (RPPA) Preparation and Analysis*

Cultured cells described above were washed with PBS, and proteins were extracted by the addition of lysis buffer (1% Triton X-100, 50 mM HEPES [pH 7.4], 150 mM NaCl, 1.5 mM  $\text{MgCl}_2$ , 1 mM EGTA, 100 mM NaF, 10 mM  $\text{NaPPi}$ , 10% glycerol, 1 mM phenylmethylsulfonyl fluoride, 1 mM  $\text{Na}_3\text{VO}_4$ , and protease and phosphoprotease inhibitors from Roche), incubated on ice for 20 minutes, centrifuged at 14,000 rpm for 10 minutes, and collected for supernatant. Protein concentration was measured using the Pierce BCA Protein Assay Kit (Thermo Fisher Scientific), and protein samples were prepared to a final concentration of 1  $\mu\text{g}/\mu\text{l}$  after mixing with 4x SDS sample buffer (40% glycerol, 8% SDS, 0.25M Tris-HCl pH 6.8, 10% 2-mercaptoethanol) to produce a 1x SDS sample buffer solution. Protein samples were then boiled at 100°C for 5 minutes and stored at -80°C for RPPA processing described here

(<https://www.mdanderson.org/research/research-resources/core-facilities/functional-proteomicsrppa-core/rppa-process.html>).

### *RNA Isolation and qPCR Analysis*

Cultured cells were washed with PBS, and total RNA was isolated using TRIzol Reagent (Thermo Fisher Scientific). For qPCR analysis of mRNA expression, cDNA was generated from purified mRNA using qSCRIPT reverse transcriptase mix (Quanta Biosciences). QPCR assays were performed using SYBR Green PCR Master Mix (Thermo Fisher Scientific) along with primers in table S9 and normalized to the *L32* gene. All qPCR reactions were performed using the 7500 Fast Real-Time PCR System (Applied Biosystems).

### *Protein Isolation and Western Blotting Analysis*

Cultured cells were washed with PBS, and proteins were extracted from cell lysates using 1xRIPA buffer (Cell Signaling) with protease inhibitors and phosphatase. Samples were loaded onto a 10% SDS polyacrylamide gel, separated by SDS-PAGE, and transferred to a nitrocellulose membrane. Membranes containing the transferred proteins were blocked with 5% w/v fat free dry milk (Bio-Rad) dissolved in TBST. Membranes were probed with the primary antibodies listed in table S5 diluted in 1% w/v bovine serum albumin (BSA) and dissolved in TBST overnight at 4°C. Next, horseradish peroxidase (HRP)-conjugated secondary antibodies diluted in blocking solution were added to the membranes and incubated at room temperature for 1 hour. HRP-induced chemiluminescence signal was produced using Pierce ECL Western Blotting Substrate (Thermo Fisher Scientific). ECL signal from antibody-probed protein was detected using autoradiography film (BioExpress) and developer.

### *Subcellular fractionation*

Fractionation assay was performed using Cell Fractionation Kit #9038 according to manufacturer instructions.

### *Cell cycle analysis*

Cells were harvested by trypsinization followed by PBS washes. Cold 70% ethanol added to cells dropwise while vortexing was used for fixation for 30 min at 4°C. Cells were washed with PBS, centrifuged to collect cell pellet. Cells were treated with RNAase and then stained with

propidium iodide for 30 min at room temperature. Cell cycle was analyzed by flow cytometry using FlowJo software (version 10).

### *Immunohistochemistry*

Paraffin-embedded tissue sections were rehydrated, and heat-mediated antigen retrieval was performed using citrate buffer, pH 6.0 (Dako Agilent Technologies). Endogenous peroxidases were blocked with 3% H<sub>2</sub>O<sub>2</sub> in TBS, and slides were further blocked with 5% goat serum in TBST. Tissues were probed with primary antibodies listed in table S7, diluted in goat serum overnight at 4°C. Slides were then washed three times with TBST and incubated with streptavidin-conjugated secondary antibodies targeting rabbit IgG diluted in goat serum for 1 hour at room temperature. Slides were washed again and incubated with biotinylated HRP in goat serum for 30 minutes at room temperature. After washing, signal was attained by developing with DAB reagent (Dako) for 5 minutes at room temperature. Slides were washed with ddH<sub>2</sub>O to stop the reaction and then stained with Harris Hematoxylin (Thermo Fisher Scientific) for 1 minute and rinsed with warm tap water for 5 minutes. Slides were dipped eight times in 0.25% HCl in 70% ethanol and rinsed with tap water again for 5 minutes. Slides were dehydrated and mounted for further analysis by bright field microscopy.

### *Immunofluorescence*

Cells were plated on poly-L-lysine coated cover slips. Cells were fixed with 100% methanol, permeabilized with 0.3% Triton-X, and blocked with 5% normal goat serum. Primary antibodies listed in table S8 were incubated overnight. Alexa-Fluor conjugated secondary antibodies were used for protein visualization (anti-mouse 546, anti-rabbit 488) and coverslips were mounted with ProLong Gold with DAPI for nuclear stain. Images were taken on the Olympus IX73 using a 40x objective.

### *Luciferase Reporter Assay*

pGL2-p21 promoter-Luc was purchased from Addgene. Human cells (H441, H358 and H1299) expressing ZEB1 and miR-200 were co-transfected with 500 ng of the reporter construct and 50 ng of the pRL-TK renilla luciferase vector (Promega) using Lipofectamine 2000 (Thermo Fisher Scientific). Assays were carried out using Dual-Luciferase Reporter Assay System (Promega), where renilla signal was used as an internal control. Relative luciferin signal was normalized to signal from the empty pGL2 promoter vector control.

### *3D-assays*

EVTs were cultured for one day using microwells as described in (26) followed by plating on a matrix comprised of Matrigel (BD-Biosciences) or a Matrigel/Collagen (1.5 mg/ml) mixture (BD-Biosciences). Media was replenished every 48 hours. Cell viability was measured using Cell Titer-Glo (Promega) following manufacturer recommendations. Luminescence intensity was measured with a Synergy HT microplate reader (BioTek) and normalized to intensities of controls. Spheres were imaged using an inverted microscope. Adobe Photoshop software (RRID:SCR\_014199) was used for RFP and GFP pixel analysis by histogram analysis of green and red pixels as a percentage of total colored pixels per field of view (FOV). Minimum number of independent FOVs counted was 4. Spheres were also imaged using an Olympus IX73 microscope.

### *Apoptosis detection*

*Annexin and PI staining:* Cells were harvested by trypsinization followed by PBS wash and twice with cold BioLegend's Cell Staining Buffer. 5  $\mu$ L of FITC Annexin V and 10  $\mu$ L of Propidium Iodide Solution were added to 100  $\mu$ L of cell suspension followed by gentle vortexing and incubation for 15 min at room temperature in the dark. 400  $\mu$ L of Annexin V Binding Buffer was added to sample. Analysis was done by flow cytometry using FlowJo software (version 10).

*NucView 405 Caspase-3 Substrate assay:* For detecting apoptosis in live Zcad fluorescent cells, a blue fluorescent caspase-3/7 substrate was used at 2  $\mu$ M concentration. Images were acquired using 405 nm laser excitation using an Eclipse Ti inverted microscope with A1+ confocal scanner (Nikon). Flow cytometry was also performed on cells incubated with NucView reagent. Briefly, cells were detached from culture substrate using trypsin. Cells were resuspended in media and NucView substrate at final concentration of 2  $\mu$ M was added to the cells. Cells were incubated at room temperature for 30 minutes, protected from light followed by analysis by flow cytometry.

### *Immunoprecipitation assay*

Cells were washed twice with PBS on ice, scraped and pelleted. Supernatant was removed and the pellet was lysed in 500  $\mu$ l lysis buffer [150 mM NaCl, 50 mM Tris-HCl (pH 7.5), 0.5% NP-40, 50 mM NaF, 1 mM Na orthovanate, 1 mM  $\beta$ -glycerophosphate, 10% glycerol, PMSF and protease inhibitor] and incubated on ice for 30 min. Samples were sonicated for 1 min and centrifuged at 13,000 rpm for 10 min. The supernatant was collected and precleared for 1 hour at

4°C with non-specific IgG and protein A/G agarose beads. Dynabeads were incubated for 1h with 2µg of antibody at 4°C on a rotating platform. 500 µg of pre-cleared lysate was subjected to immunoprecipitation overnight at 4°C. Antibody-antigen complexes were washed with lysis buffer and then eluted with 2x SDS sample Buffer at 100°C and analyzed by western blot (Supplemental Table 6).

### *Chromatin Immunoprecipitation (ChIP)*

Cells were cross-linked with 1% formaldehyde at room temperature for 10 min. Glycine was added to a final concentration of 0.125 M for 5 min at room temperature. Cells were then washed with PBS with protease inhibitor, scraped and centrifuged (12,000 rpm, 4°C for 2 min). The supernatant was removed and the pellet was resuspended in 1 ml of lysis buffer [50mM Tris-HCl (pH 8.1), 10mM EDTA, 1% SDS, protease inhibitor] incubated on ice for 10 min. Samples were sonicated on ice for 30 cycles at 50% amplitude with 5 seconds pulse intervals and 10 seconds rest intervals. Supernatants were recovered by centrifugation at 12,000 rpm for 5 min. Lysates are diluted 1:10 in ChIP dilution buffer [16.7 mM Tris-HCl (pH 8.1), 16.7 mM NaCl, 1.2 mM EDTA, 0.01% SDS, 1.1% Triton X-100, protease inhibitor]. Sheared DNA was pre-cleared with 2 µg sheared salmon sperm DNA and 30 µL protein A/G beads (sc-2003) at 4°C for 1 hour with rotation. Beads were pelleted, the supernatant was collected and an aliquot (1/20th) of the chromatin preparation was set aside and designated as the Input Fraction. The rest of the sample was divided into parts for incubation with 2 µg rabbit IgG (sc-2027) and ZEB1 (santacruz) antibodies overnight at 4°C with rotation. The immune complexes were captured the next day by incubation with 30 µL of pre-cleared beads and 2 µg sheared salmon sperm DNA for 2 h at 4°C. Beads were pelleted by centrifugation for 1 min at 4°C at 100 g and washed sequentially for 10 min at 4°C with rotation with 1 ml of the following buffers: low salt wash buffer [20 mM Tris-HCl (pH 8.1), 150 mM NaCl, 2 mM EDTA, 1% Triton X-100, 0.1% SDS]; high salt wash buffer [20 mM Tris-HCl (pH 8.1), 500 mM NaCl, 2 mM EDTA, 1% Triton X-100, 0.1% SDS]; LiCl wash buffer [10 mM Tris-HCl (pH 8.1), 1 mM EDTA, 1% sodium deoxycholate, 1% NP-40, 0.25 mM LiCl]. Finally, the beads were washed twice with 1 ml TE buffer [1 mM EDTA, 10 mM Tris-HCl (pH 8.0)] for 5 min at 4°C. The immuno-complexes were then eluted in 120 µl elution buffer [1% SDS, 100 mM NaHCO<sub>3</sub>] for 15 min with rotation at room temperature. Reverse cross-linking was done by adding NaCl to the final concentration of 200 mM to ChIP and input samples and incubating at 65°C for 6 hrs. This followed by treatment with RNAase and proteinase K (40 µg/ml) incubating for 1 hour at 45°C. DNA was purified using QIAquick PCR Purification Kit (Qiagen), and 50 ng of eluted DNA was used for each qPCR reaction with primers listed in Table S10 to quantify relative ChIP signal.

Figure S1

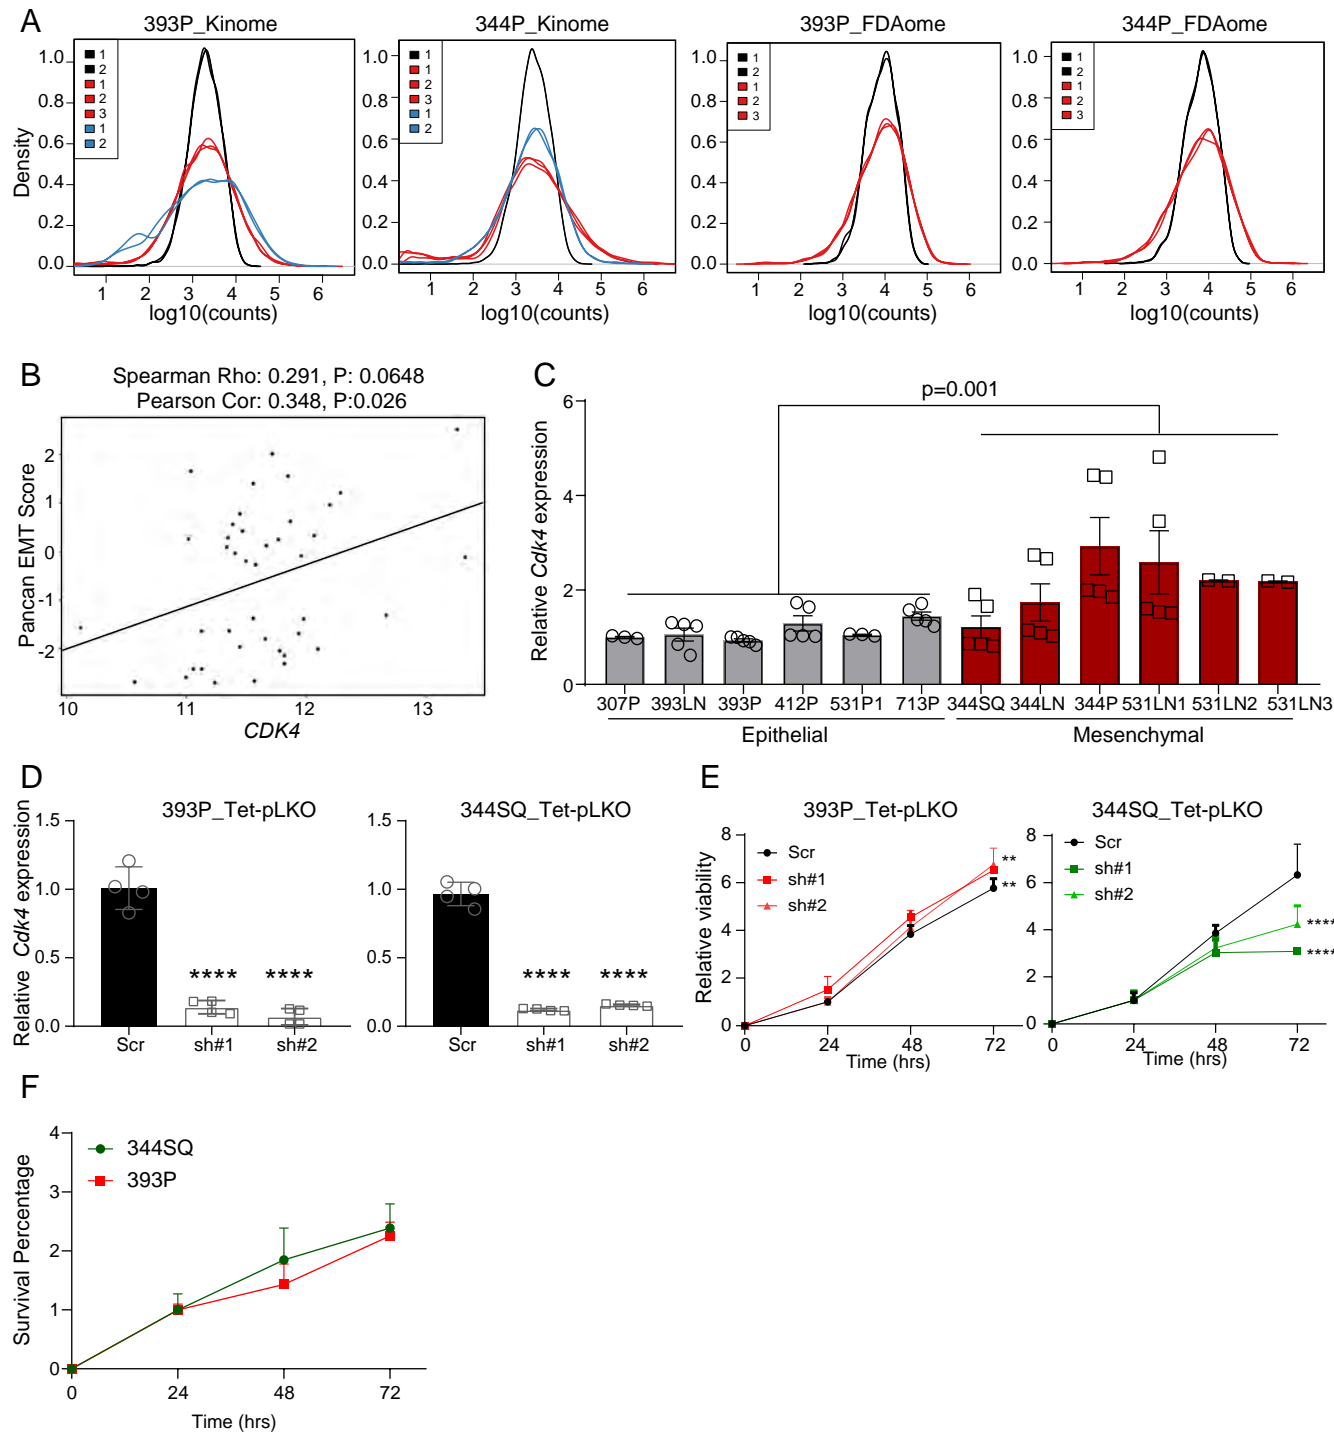

**Figure S1: Mesenchymal lung cancer cells exhibit increased dependency on CDK4 for growth.** (A) Viral integration distribution of reference population, cell lines and tumors determined through barcode sequencing (counts per million). Black = reference, red = in vivo samples, blue = in vitro samples. (B) Cluster plot analysis of correlation between EMT score and *CDK4* mRNA expression of 41 human KRAS mutant NSCLC cell lines. (C) Relative *CDK4* mRNA expression in murine epithelial and mesenchymal cells. Data is represented as mean  $\pm$  SEM. Unpaired t-test was used for statistical analysis. (D) Relative *Cdk4* mRNA expression upon doxycycline mediated knockdown of *Cdk4* for 6 days in 393P and 344SQ cells. Data is represented as mean  $\pm$  SD. One and two-way ANOVA test was used for statistical analysis. (E) Cell viability of 393P and 344SQ cells with *Cdk4* knockdown over 72 hours measured by MTT assay. Data is represented as mean  $\pm$  SD. Two-way ANOVA test was used for statistical analysis. (F) Growth rates of 393P and 344SQ cells over 72 hours as measured by WST-1 assay. Data is represented as mean  $\pm$  SD.



Figure S2

A

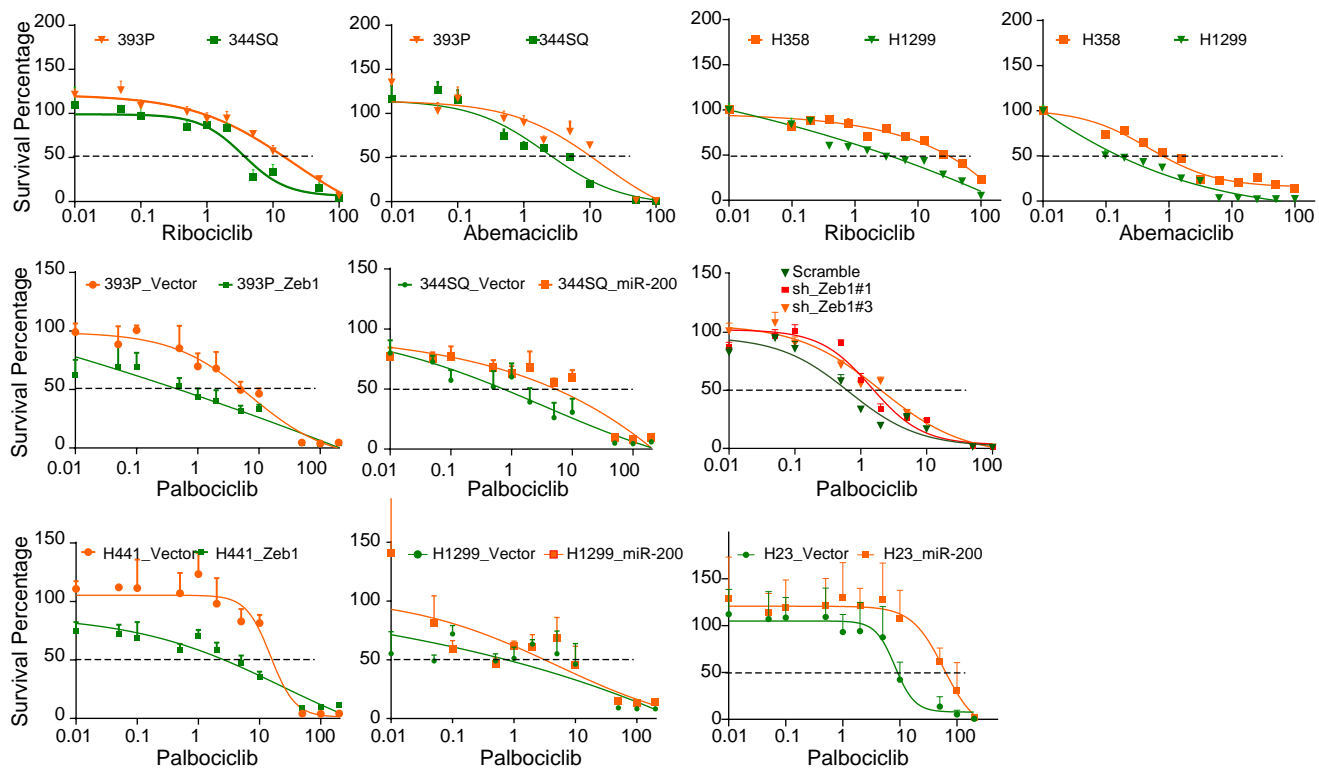

B

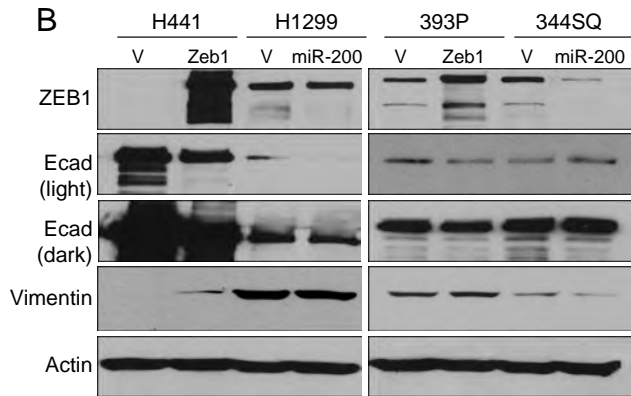

C

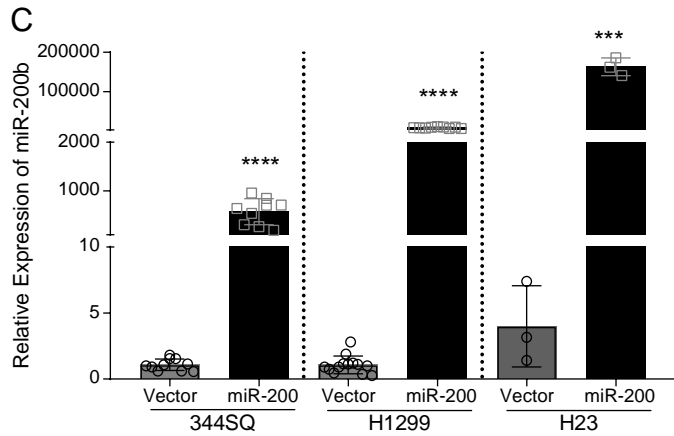

D

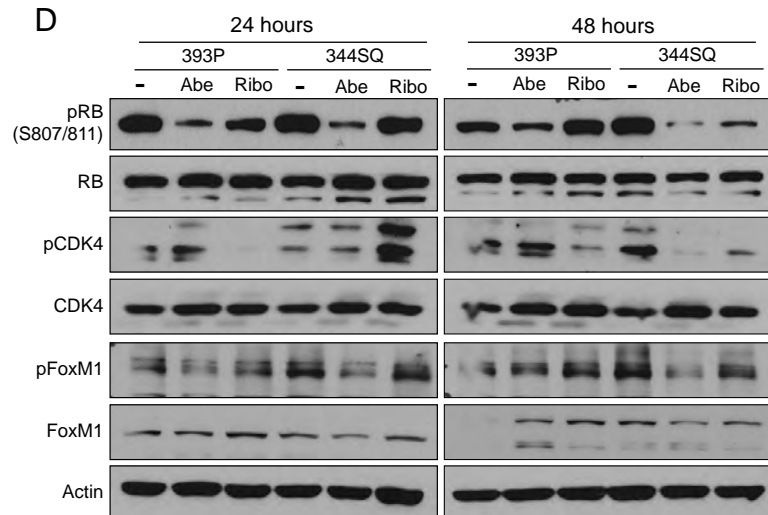

**Figure S2: Mesenchymal lung cancer cells exhibit increased dependency on CDK4 for growth.** (A) In vitro cell survival response after 48 hour abemaciclib, ribociclib or palbociclib treatment in a panel of murine and human lung cancer cell lines. n=8 per each drug concentration. The curve was generated using a nonlinear regression fit model. (B) Western blot analysis showing EMT and MET induction isogenic pairs of human and murine cell lines. (C) Relative expression of miR-200b in isogenic pairs of human and murine cell lines overexpressing miR-200. Data is represented as mean  $\pm$  SD. Unpaired t-test was used for statistical analysis. \*\*\*\* p<0.0001; \*\*\* p<0.005 (D) Western blot showing the effect on signaling in 393P and 344SQ tumor cells upon treatment with abemaciclib (A: 2  $\mu$ M) and ribociclib (R: 2  $\mu$ M) for 24 and 48 hours.

Figure S3

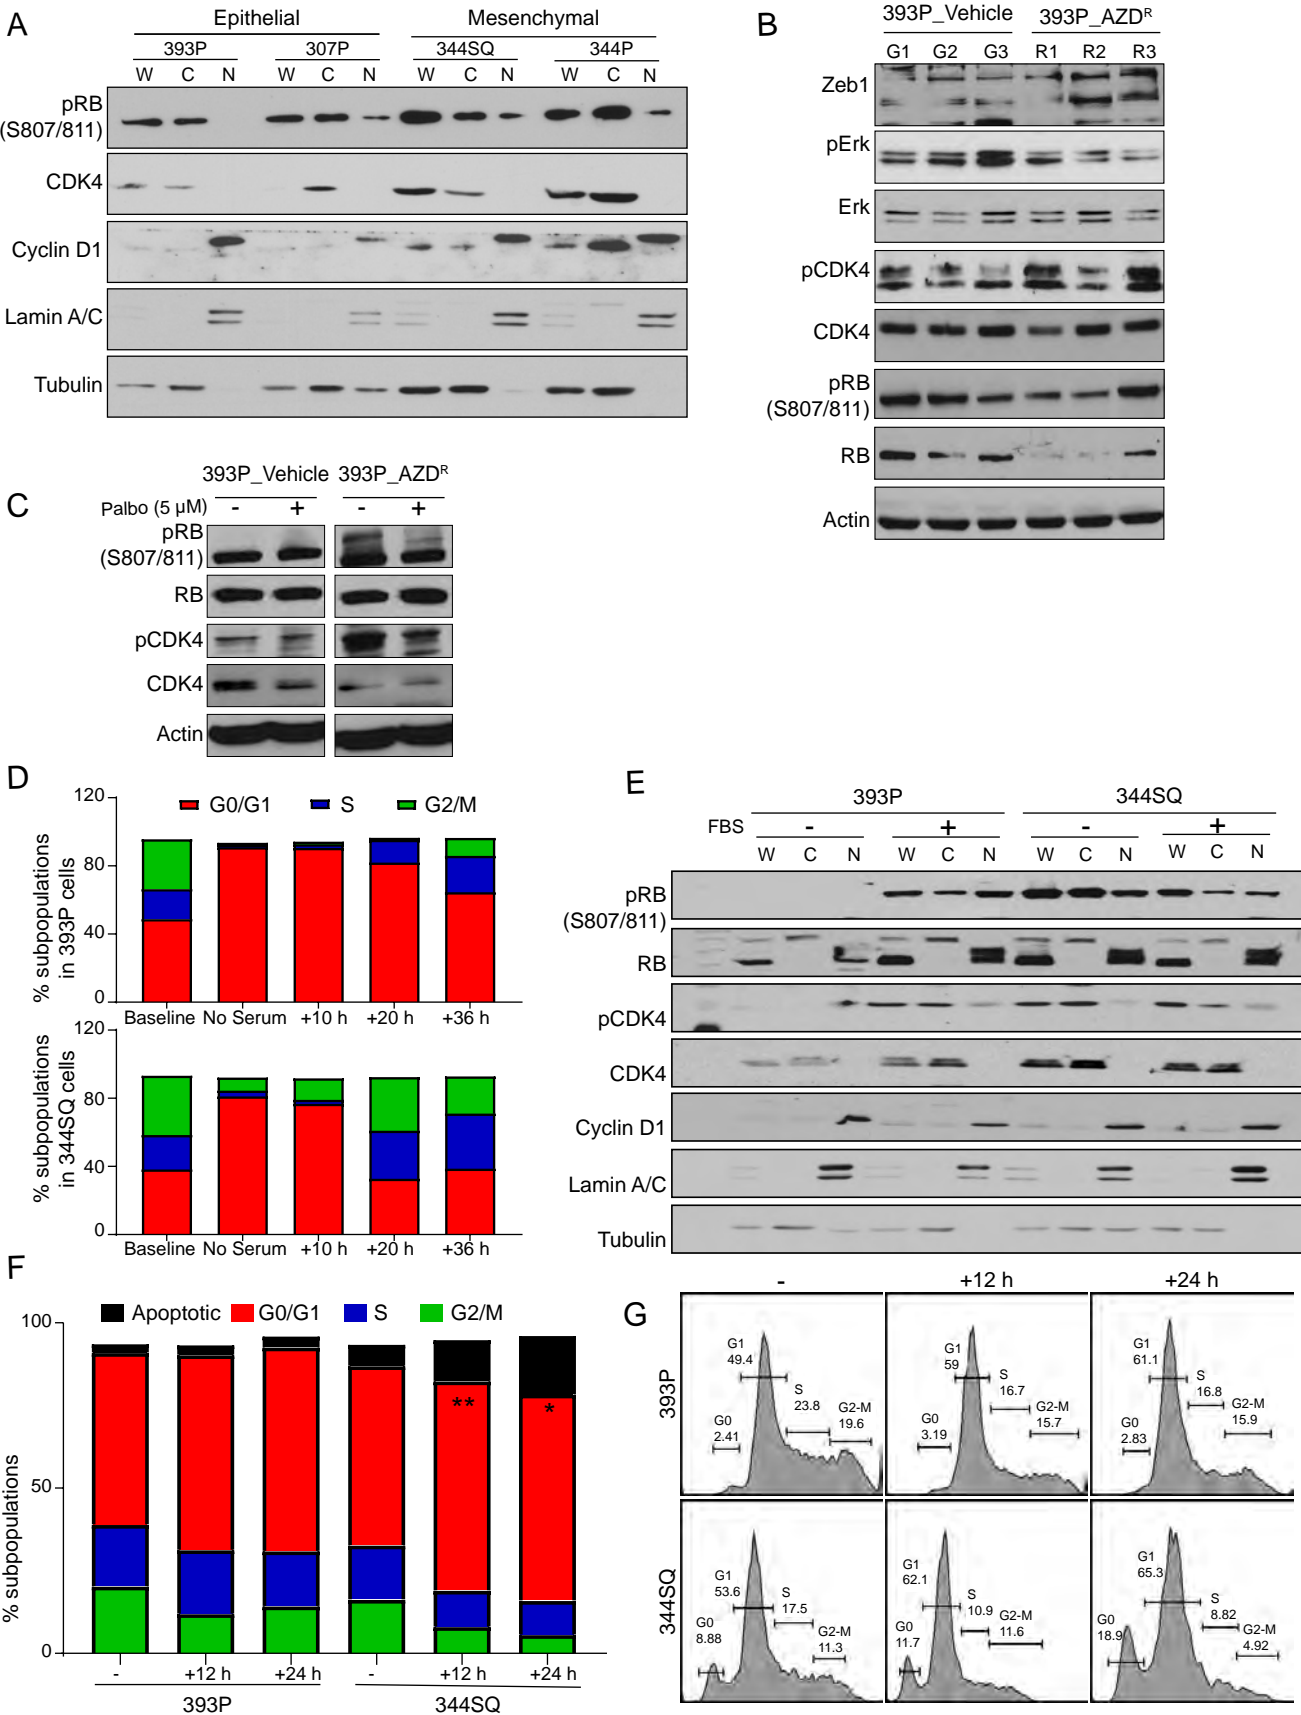

**Figure S3: The CDK4 pathway is dynamically regulated by the EMT status of tumor cells.**

(A) Subcellular fractionation and western blot analysis of 393P, 307P and 344SQ, 344P cells for indicated markers. (B) Western blot analysis on cell lines derived from 393P tumors treated with vehicle or AZD6244 for indicated markers. (C) Western blot analysis of 393P\_vehicle and 393P\_AZD<sup>R</sup> cells after treatment with palbociclib (5 $\mu$ M) for 48 hours for indicated markers. (D) Cell cycle analysis 393P and 344SQ cells using propidium iodide (PI). Baseline cell cycle was determined by staining cells in culture with PI. Cell cycle arrest was induced by serum starvation of cells for 24 hours followed by release into cell cycle by addition of FBS containing media and analyzed after 10, 20 and 36 hours. (E) Subcellular fractionation followed by western blot analysis of indicated cell cycle markers. (F) Cell cycle analysis 393P and 344SQ cells treated with palbociclib (5 $\mu$ M) for 12 and 24 hours using propidium iodide (PI). (G) Quantification of subpopulations in different cell cycle phase. Data are presented as mean  $\pm$  SD and statistical analysis was done using one-way ANOVA test. \*  $p < 0.05$ , \*\*  $p < 0.01$ .

**Figure S4**

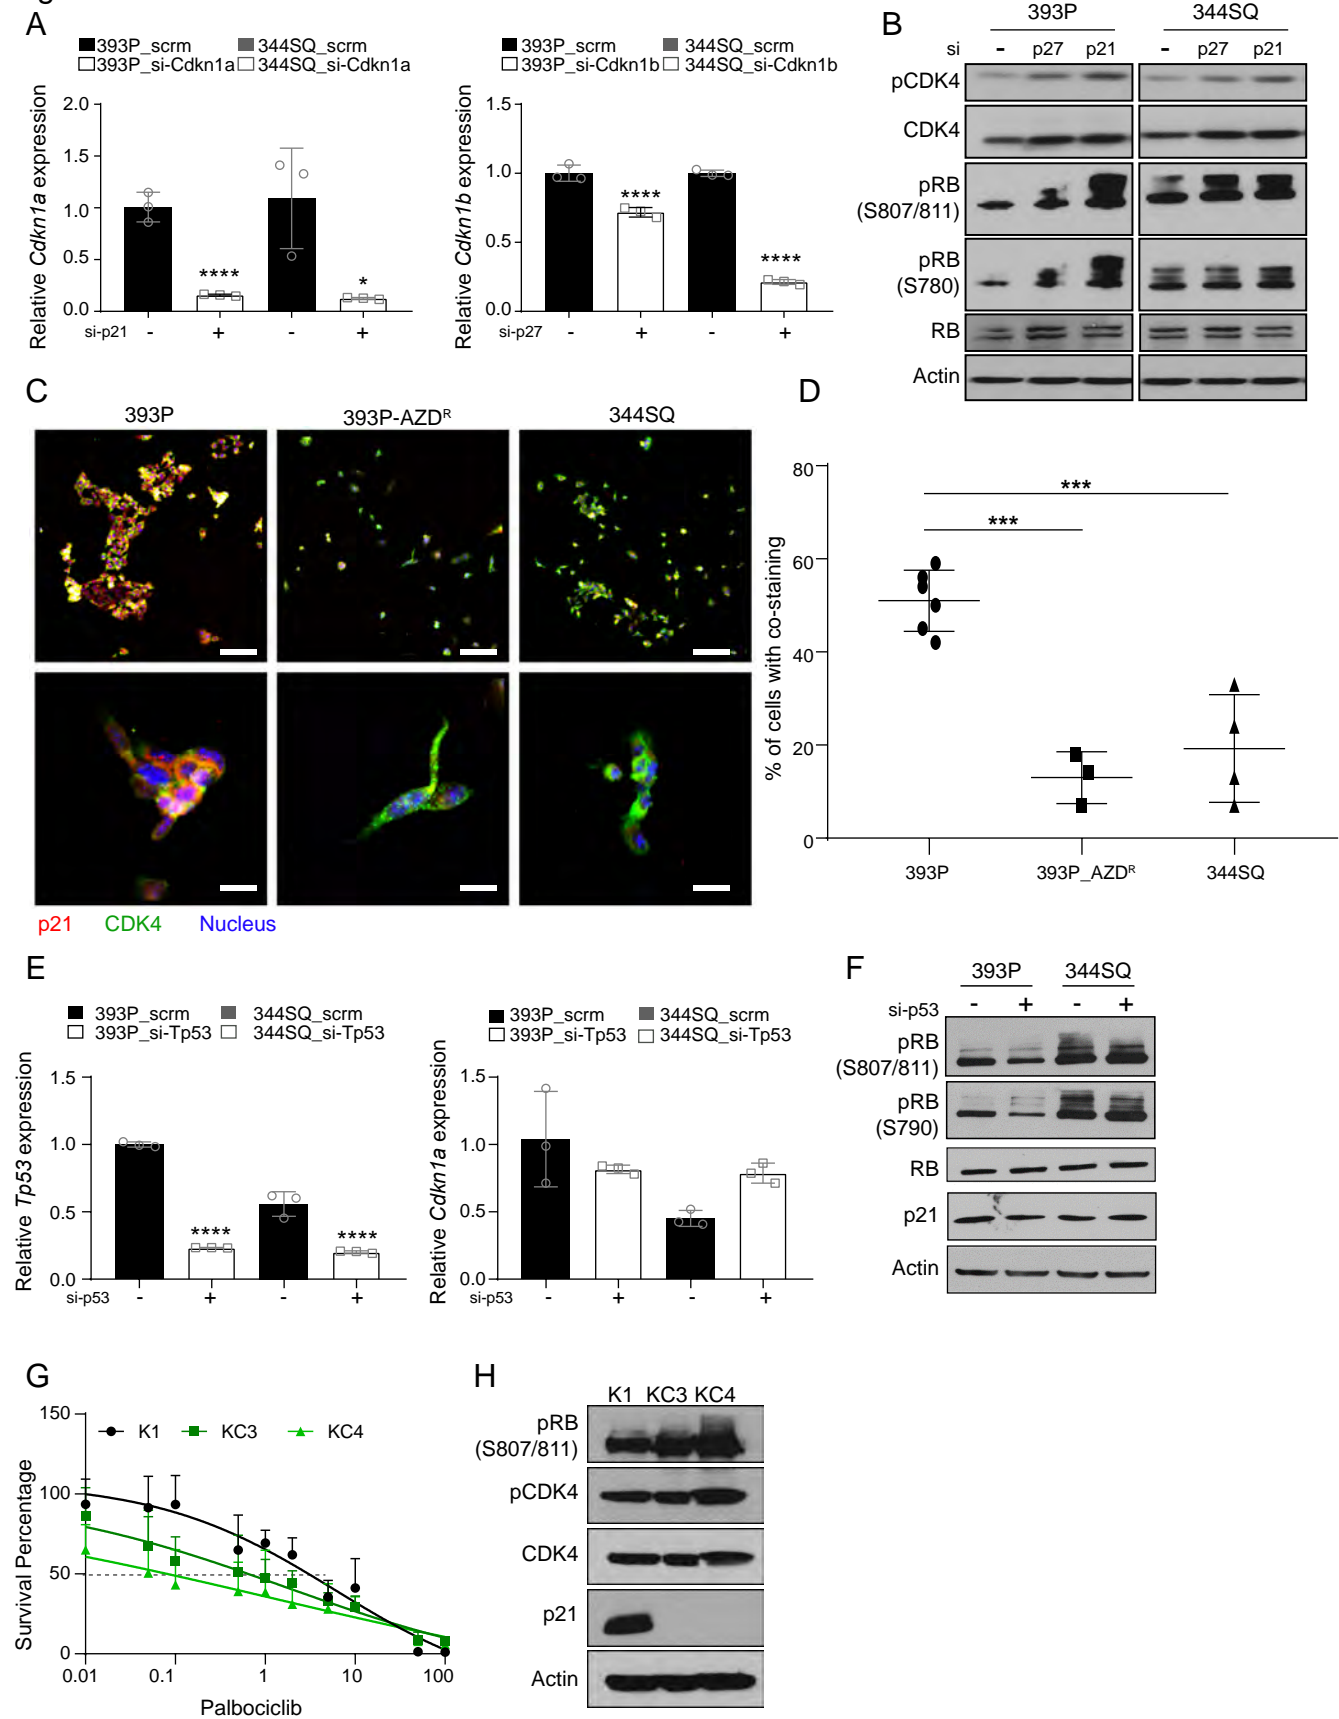

**Figure S4: Differential p21 expression in epithelial and mesenchymal cells.** (A) Transient knockdown of p21 and p27 using 20 nM si-RNAs for 48 hours in 393P and 344SQ cells. (B) Western blot analysis indicated markers after 48 hours of transient knockdown of p21 and p27 in 393P and 344SQ cells. (C) Immunofluorescent staining of 393P, 393P\_AZD<sup>R</sup> and 344SQ cells. Scale bar top: 100  $\mu$ m, bottom: 10  $\mu$ m. (D) Quantification of cells co-staining positive for CDK4 and p21 in each cell lines. 4-6 biological replicates were analyzed for quantification of the fluorescent signal. (E) Relative mRNA expression of *Tp53* and *Cdkn1a* with transient knockdown of *Tp53*. (F) Western blot analysis of indicated markers upon transient knockdown of *Tp53* for 48 hours. (G) In vitro cell viability after 48 hour palbociclib treatment of K1, KC3 and KC4 cell lines. n=8 per each drug concentration. The curve was generated using a nonlinear regression fit model. (H) Western blot analysis of indicated markers in K1, KC3 and KC4 cell lines. Data are presented as mean  $\pm$  SD and unpaired t-test was used in all panels.

Figure S5

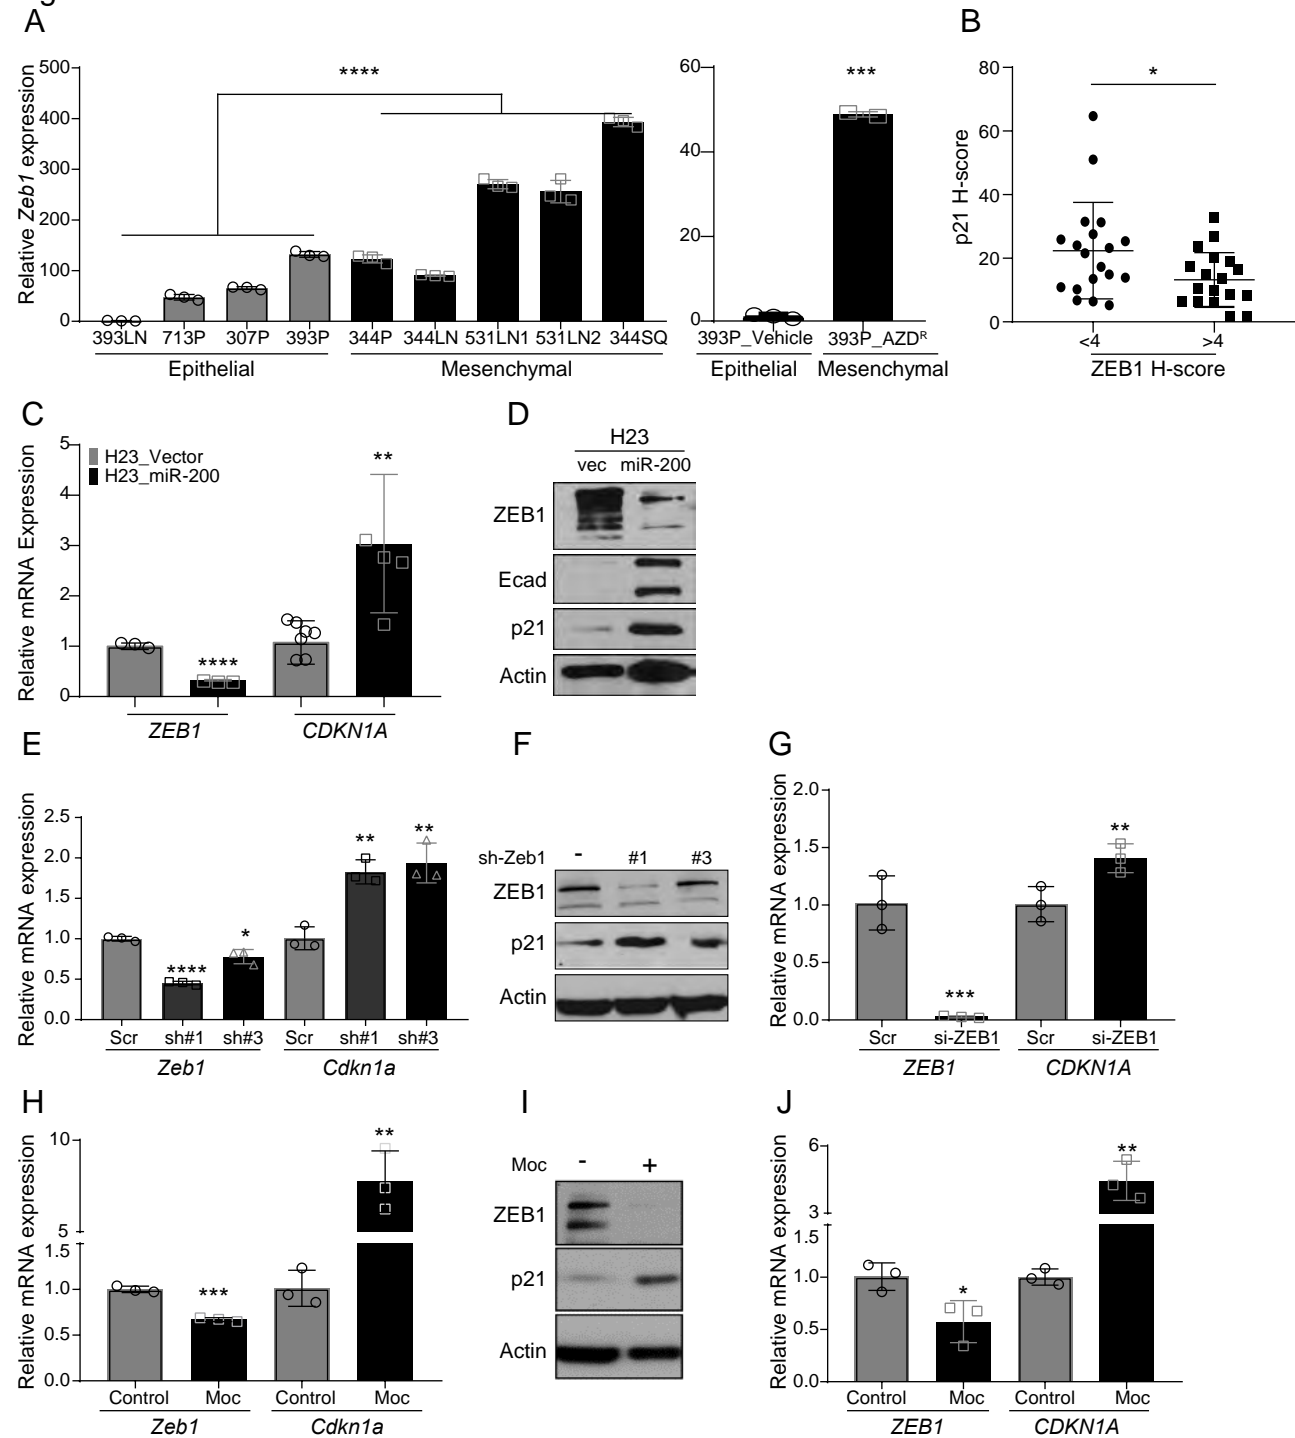

**Figure S5: ZEB1 regulates p21 expression and causes differential CDK4 pathway activation.** (A) Relative expression of *Zeb1* mRNA in a panel of murine lung cancer cells. (B) NSCLC specimens divided into two groups based on ZEB1 H-score and correlated with p21 H-score. (C) Relative mRNA expression of *ZEB1* and *CDKN1A* in H23 cells with miR-200 overexpression. (D) Western blot analysis in H23 cells with miR-200 overexpression for indicated markers. (E) Relative mRNA expression of indicated markers in 344SQ cells with stable *ZEB1* knockdown. (F) Western blot analysis of indicated markers in 344SQ cells with stable *ZEB1* knockdown. (G) Relative mRNA expression of indicated markers in H1299 cells with transient *ZEB1* knockdown. (H) Relative mRNA expression of indicated markers in 344SQ cells upon treatment with mocetinostat (1 $\mu$ M) for 48 hours.. (I) Western blot analysis of indicated markers in 344SQ cells upon treatment with mocetinostat (1 $\mu$ M) for 48 hours. (J) Relative mRNA expression of indicated markers in H1299 cells upon treatment with mocetinostat (1 $\mu$ M) for 48 hours. One-way ANOVA was used for statistical analysis. Data is represented as mean  $\pm$  SD. Statistical analysis for all panels unpaired t-test. \*\*\*\* p<0.0001; \*\*\* p<0.005; \*\* p<0.001; \* p,< 0.05.



Figure S6

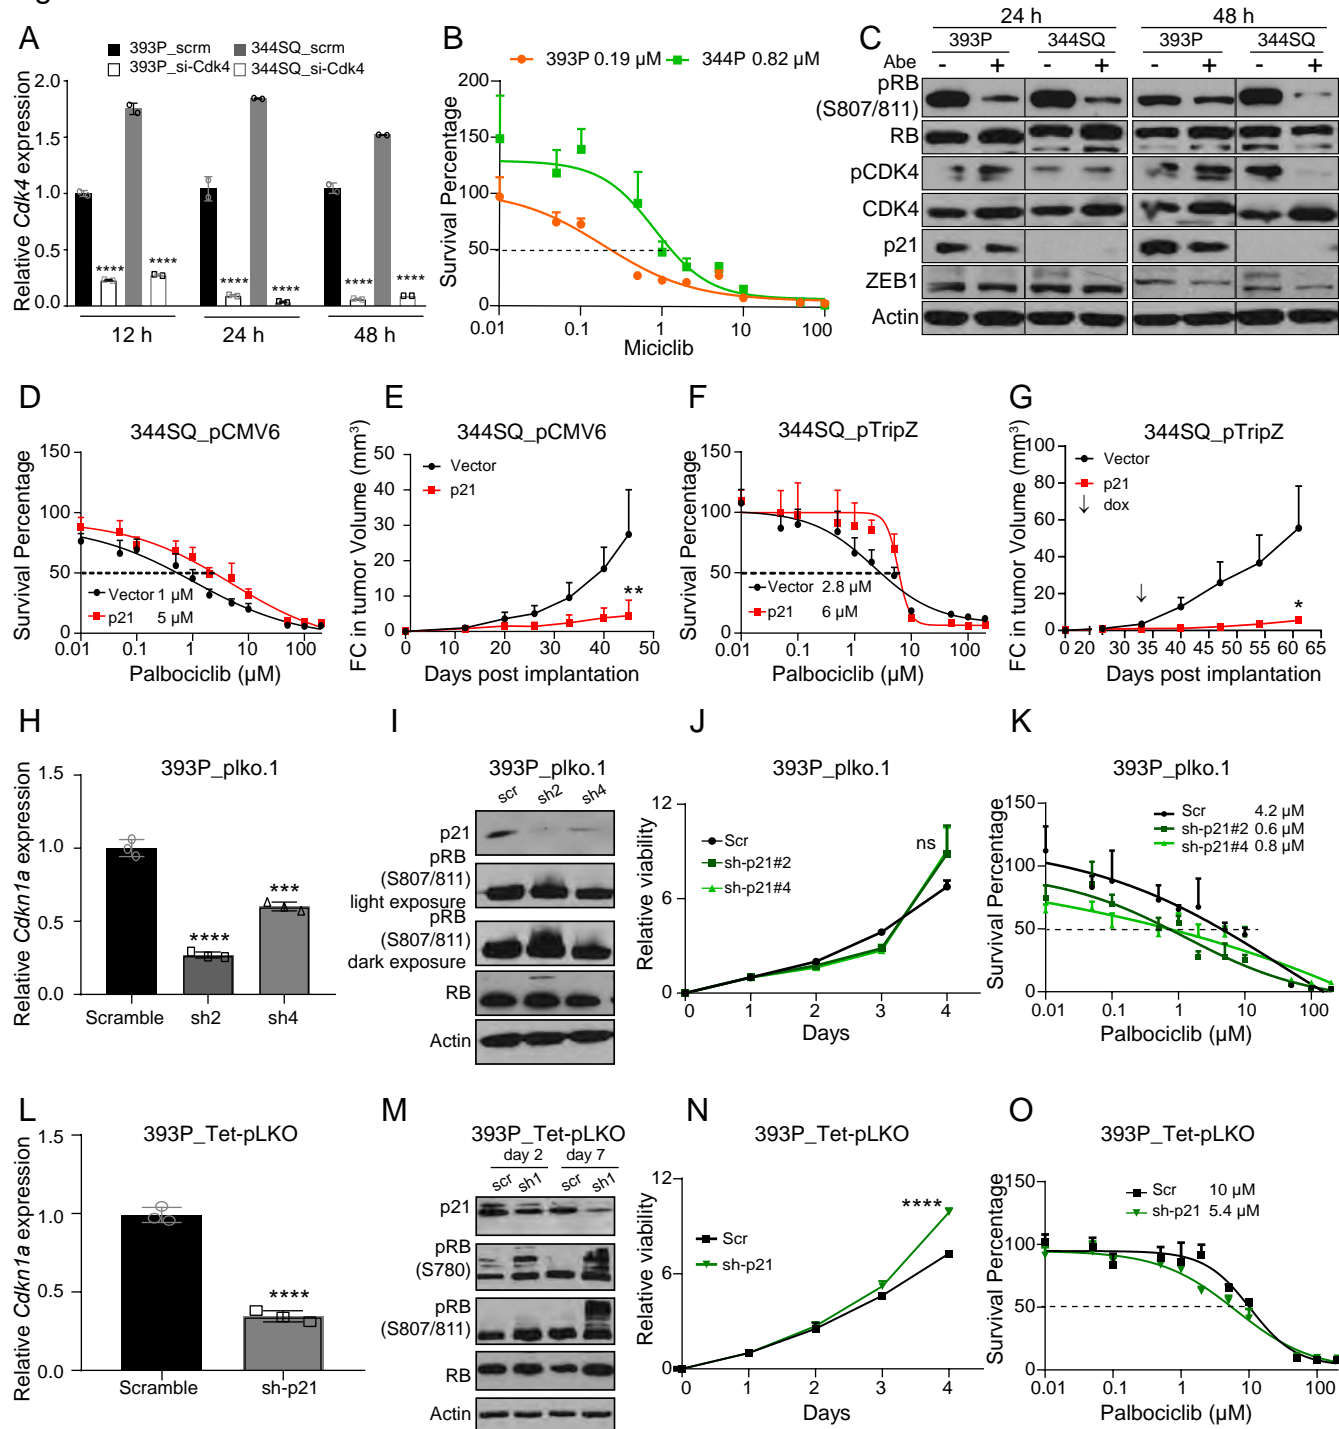

**Figure S6: Suppression of p21 in mesenchymal cells regulates CDK4 pathway.** (A) Relative *CDK4* mRNA expression after transient knockdown using 20 nM si-RNA. (B) Cell viability after 48 hour miciclib treatment in 393P and 344P cells. (C) Western blot analysis of CDK4 pathway after treatment with 2  $\mu$ M of abemaciclib at indicated times. (D) Cell viability after 48 hours of palbociclib treatment in 344SQ cells  $\pm$  p21. (E) Fold change in tumor volume with constitutive p21 overexpression in 344SQ cells. Data are presented as mean  $\pm$  SEM. (F) Cell viability after 48 hour palbociclib treatment in 344SQ cells  $\pm$  p21 with doxycycline induction. (G) Fold change in tumor volume with p21 overexpression in 344SQ cells with doxycycline feed. Doxycycline feed was started after tumors reached a size of 100-150 mm<sup>3</sup> (indicated by arrow). Data are presented as mean  $\pm$  SEM. (H) Relative mRNA *Cdkn1a* expression in 393P cells with stable knockdown using shRNA for *Cdkn1a*. (I) Western blot analysis for CDK4 pathway in response to *Cdkn1a* knockdown. (J) Growth rates of 393P cells  $\pm$  p21 knockdown over 4 days measured by WST-1 assay. (K) Cell viability after 48 hours of palbociclib treatment in 393P cells with *Cdkn1a* knockdown. (L) Relative mRNA expression of *Cdkn1a* in 393P cells with knockdown using doxycycline inducible shRNA for *Cdkn1a* for 48 hours. (M) Western blot analysis for CDK4 pathway in 393P in response to *Cdkn1a* knockdown using doxycycline inducible shRNA for *Cdkn1a* for 2 and 7 days. (N) Growth rates of 393P cells  $\pm$  p21 knockdown with doxycycline induction of shRNA over 4 days measured by WST-1 assay. (O) Cell viability after 48 hours of palbociclib treatment in 393P cells with *Cdkn1a* knockdown with doxycycline induced shRNA. Cell viability curves in B, D, F, K, O were generated using a nonlinear regression fit model. Data are presented as mean  $\pm$  SD. n=8 per each drug concentration. IC50 for each cell line and drug is listed in the graph. Statistical analysis for A, H and L: One-way ANOVA, E and G: Unpaired t-test and J and N: Two-way ANOVA. \*\*\*\* p<0.0001; \*\*\* p<0.005; \*\* p<0.001; \* p< 0.05; ns: not significant.

Figure S7

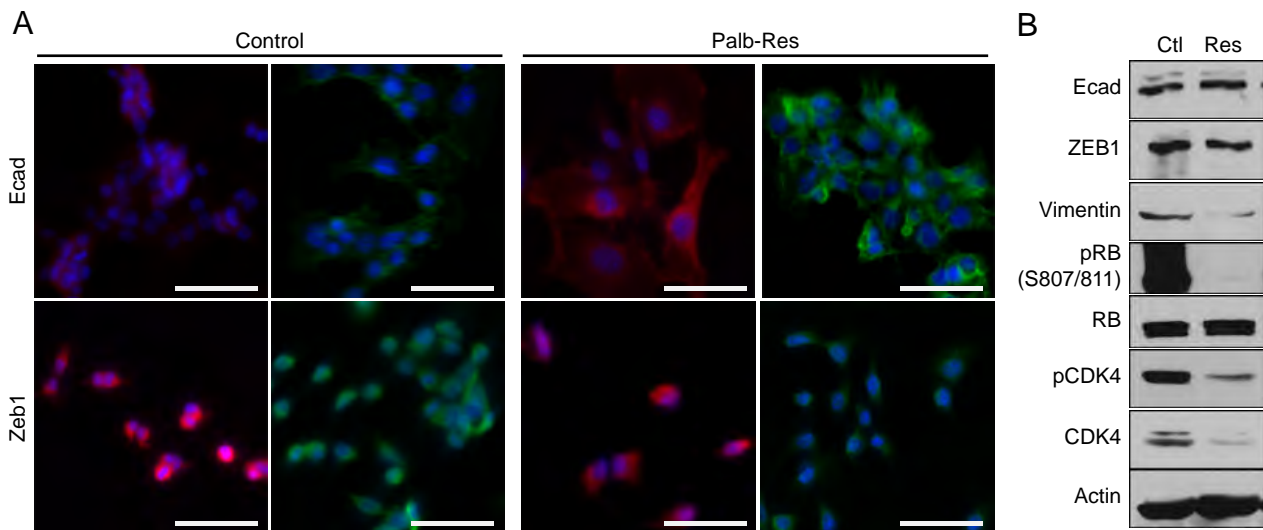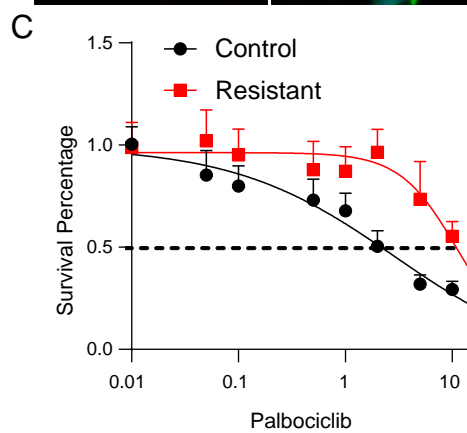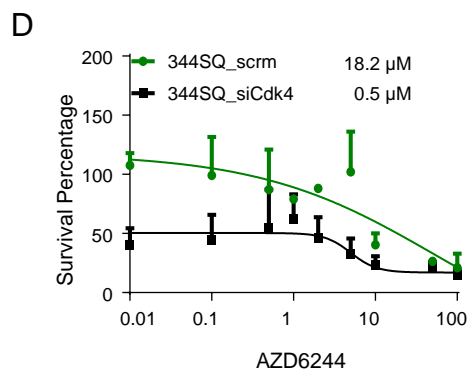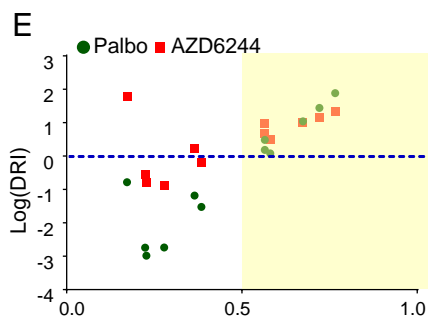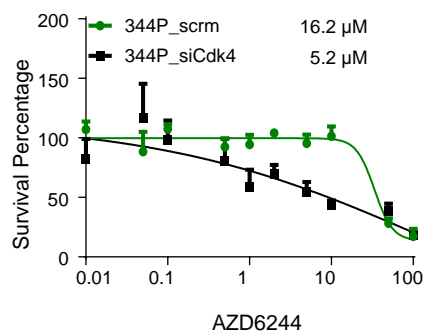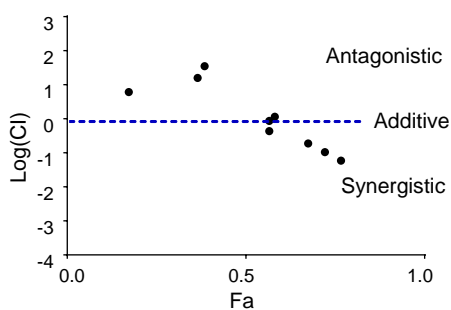

**Figure S7: Palbociclib treatment induces MET in lung cancer cells.** (A) Immunofluorescent staining in 344SQ control and palbociclib resistant cells for indicated markers. Blue: DAPI. Scale bar: 50  $\mu\text{m}$  (B) Western blot analysis of indicated markers in 344SQ control and palbociclib resistant cells. (C) Cell viability after 48 hours of palbociclib treatment in 344SQ control and palbociclib resistant cells. Cell viability curves were generated using a nonlinear regression fit model. Data are presented as mean  $\pm$  SD. n=8 per each drug concentration. (D) In vitro cell viability assay on 344SQ (top) and 344P (bottom) lung cancer cell lines with or without transient knockdown of CDK4 and treatment with a range of concentrations of AZD6244 for 48 hours. n=8 per drug concentration. The curve was generated using a nonlinear regression fit model. (E) Palbociclib and AZD6244 were used to determine the Drug Reduction Index (DRI) and Combination Index (CI) using Chou-Talalay method on 344SQ cells.

**Figure S8**

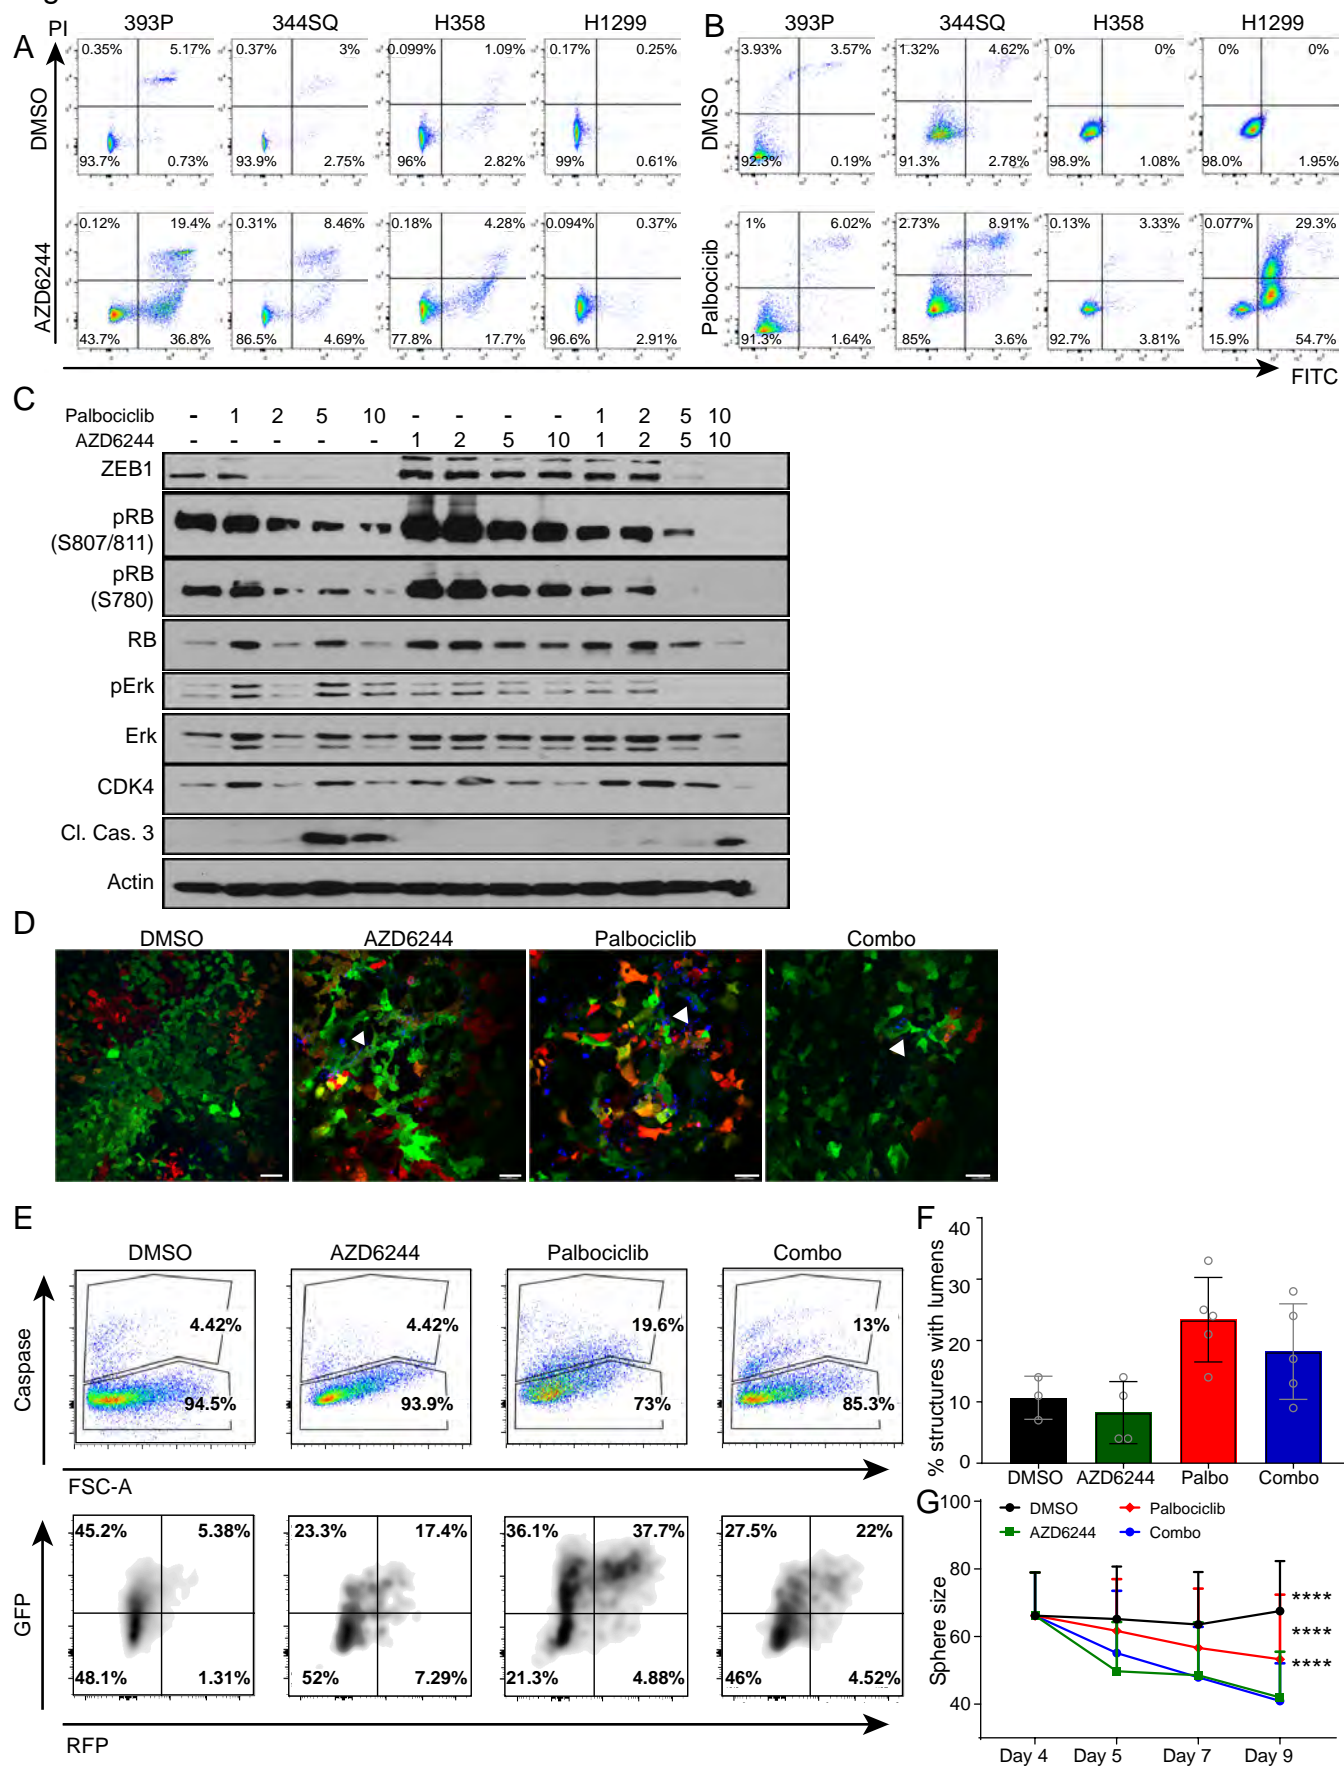

**Figure S8: Co-targeting CDK4 and MAPK pathways targets different tumor cell subsets.**

(A-B) Representative plots from one set of annexin V and PI staining experiments performed in triplicate in 5A are shown. Early apoptotic cells (annexin V+ and PI-) are shown in the lower right quadrant, and late apoptotic cells (annexin V+ and PI+) are shown in the upper right quadrant. (C) Western blot analysis of 344SQ\_Z-cad cells treated with increasing concentrations of palbociclib, AZD6244 or both. (D) 344SQ\_Z-cad cells treated with DMSO, AZD6244 (5  $\mu$ M), palbociclib (5  $\mu$ M) or the combination for 48 hours. NucView® 405 Caspase 3 substrate was added to each condition as a readout for apoptosis. Representative fluorescent images were acquired 48 hours after addition of drugs (left). Scale bar = 50  $\mu$ m. Arrows indicate apoptotic cells. (E) 344SQ\_Z-cad cells treated with indicated drugs were stained with NucView® 405 Caspase 3 substrate and analyzed by flow cytometry. Representative plots are shown. (F) EVT<sub>s</sub> cultured in MG and treated with drugs indicated were scored for percentage of structures with central lumens. n=5 FOVs. Treatment groups were compared to DMSO using one-way ANOVA. (G) Quantification of size of EVT<sub>s</sub> from 5F at indicated times after plating in MG and treatment with indicated drugs. One-way ANOVA was used to determine statistical significance. \*\*\*\* p<0.0001; \* p< 0.05.

Figure S9

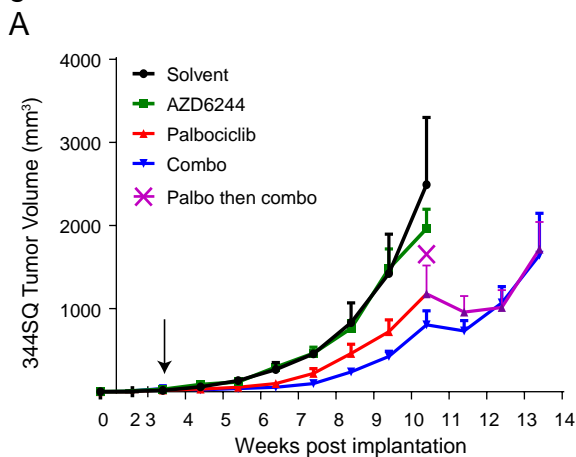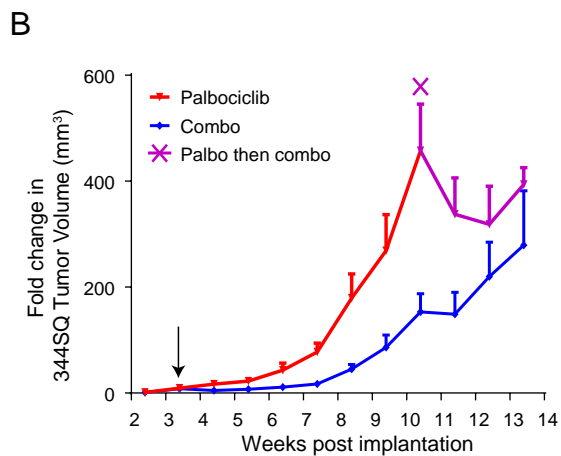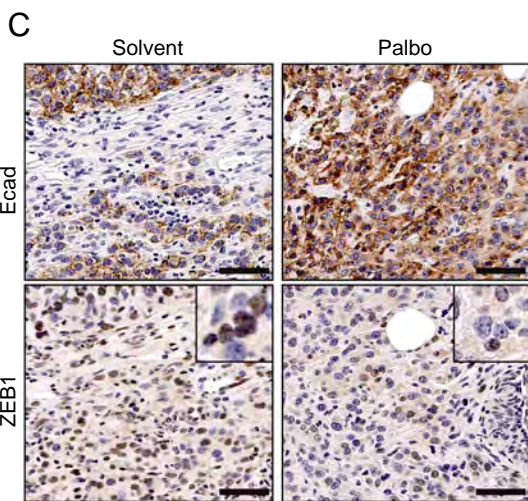

**D**

| Model            | Combo EAR | Combo actual | Bliss effect |
|------------------|-----------|--------------|--------------|
| 344SQ_short term | 383.4     | 350.9        | Additive     |
| 344SQ_long term  | 342.8     | 237.4        | Additive     |
| 393P             | 378.0     | 178.4        | Synergistic  |

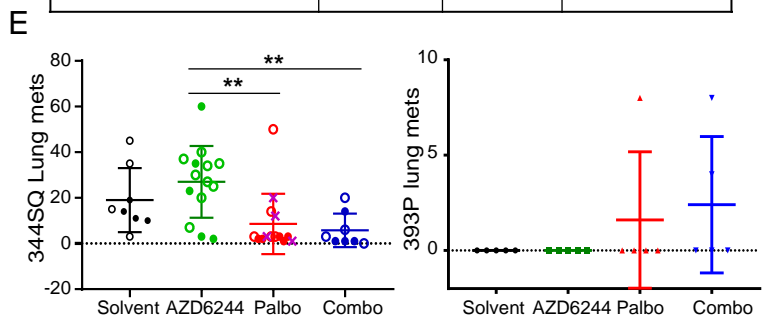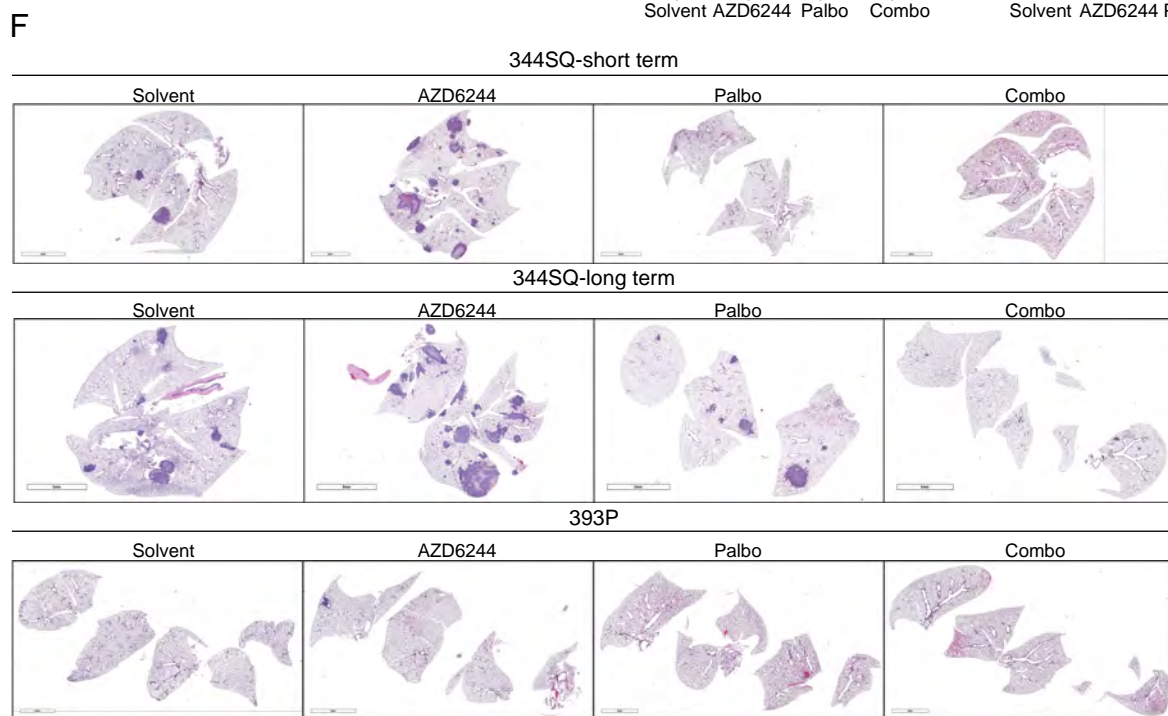

**Figure S9: Combination of MEK and CDK4 inhibitors controls syngeneic tumor growth and prevents emergence of EMT mediated resistance.** (A) 344SQ subcutaneous tumors were treated with solvent (n=5), AZD6244 (25 mg/kg) (n=10), palbociclib (50 mg/kg) (n=10) or combination (n=5) for 7 weeks at which point resistance to palbociclib emerged. 5 mice from palbociclib treatment alone arm were converted to combination arm and treatment was continued for another 3 weeks (marked by purple X). (B) Fold change in 344SQ tumors in the palbociclib and combo arms over 13 weeks. (C) Immunohistochemical analysis on 344SQ tumors treated with solvent or palbociclib for 7 weeks with indicated markers. Scale bar: 50  $\mu$ m. (D) Summary of Bliss effect analysis of the in vivo studies (5A, 5B, S9A and S9B). The mean of expected additive tumor volumes with combination (combo EAR) treatment were calculated by Bliss independent method. The actual tumor volumes with combination (combo actual) treatment lower than the expected additive tumor volumes are considered as synergistic. (E) At necropsy, mouse lungs from the experiment described in (5A, 5B, S9A and S9B) were analyzed for macroscopic metastatic lung nodules in each treatment group. 344SQ tumors: Black solid circles: short term solvent, black open circles: long term solvent. Green solid circles: short term AZD6244, green open circles: long term palbociclib, purple crosses: palbo then combo. Blue solid circles: short term combo, blue open circles: long term combo. (F) Hematoxylin and eosin (H&E) staining of whole lung sections. Representative images of lungs harvested in (E). Data are presented as mean  $\pm$  SD. Statistical significance was determined by one-way ANOVA.



Figure S10

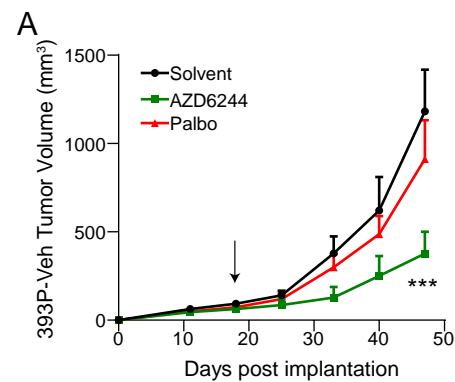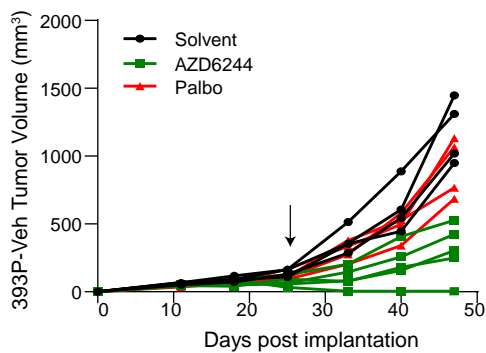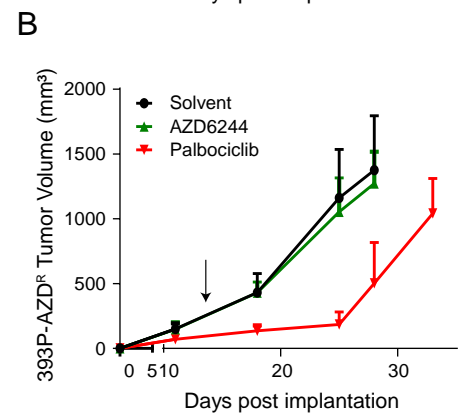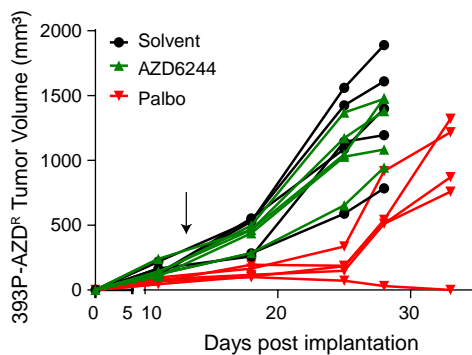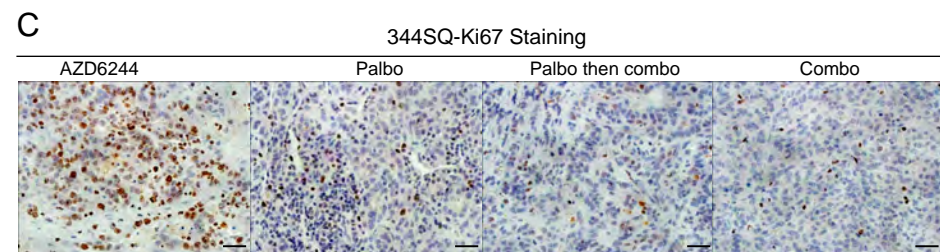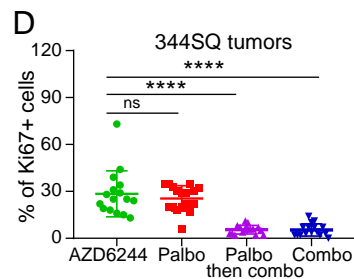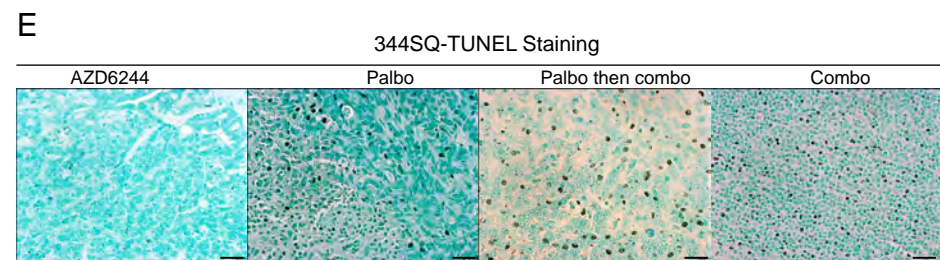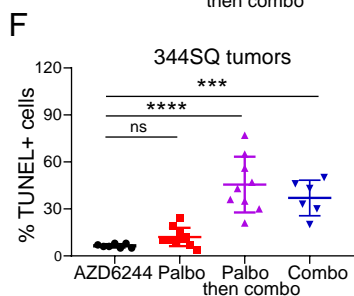

**Figure S10: Combination of MEK and CDK4 inhibitors controls syngeneic tumor growth and prevents emergence of EMT mediated resistance.** (A) In vivo volume measurements of 393P-vehicle subcutaneous tumors in syngeneic WT mice (n=5 per group) after daily treatment with AZD6244 (25 mg/kg) or palbociclib (50 mg/kg). Arrow indicates start of treatment at day 20. Individual growth curves of tumors (right). (B) In vivo volume measurements of 393P-AZD<sup>R</sup> subcutaneous tumors in syngeneic WT mice (n=5 per group) after daily treatment with AZD6244 (25 mg/kg) or palbociclib (50 mg/kg). Arrow indicates start of treatment at day 14. Individual growth curves of tumors (right). (C-F) 344SQ tumors from the long term experiments described in (S9A) were stained with Ki67 and TUNEL assay to measure cell proliferation and cell death respectively. Representative IHC images are shown in C and E. Scale bar: 50  $\mu$ m. Images were quantified for Ki67 (D) and TUNEL (F) staining in each treatment group. n=2-3 per group with 3-6 FOV per mouse. Data are presented as mean  $\pm$  SD. Statistical significance of was determined by one-way ANOVA.

Figure S11

A

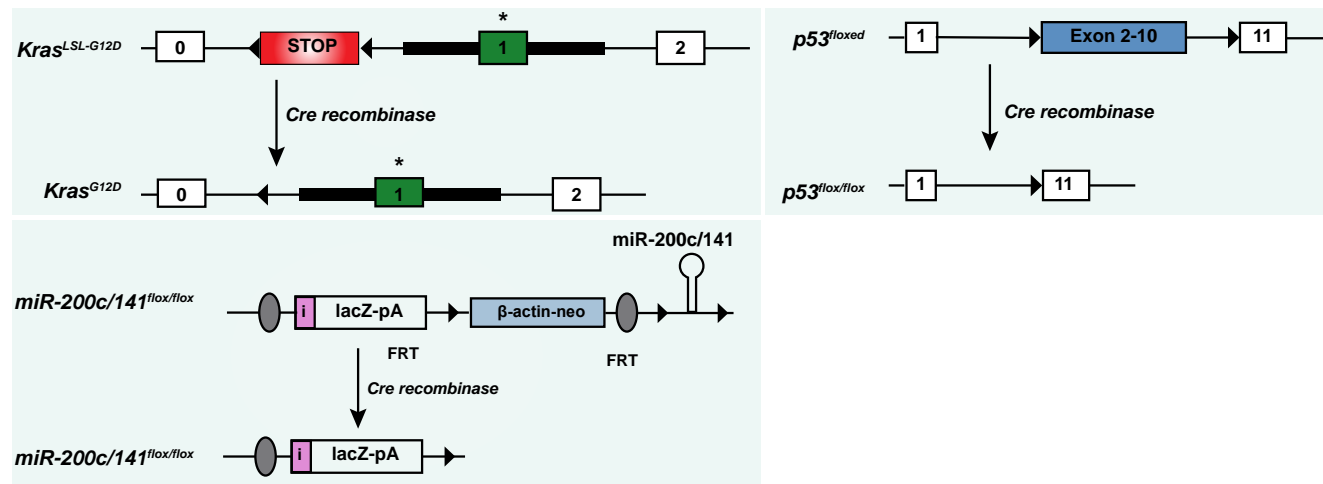

B

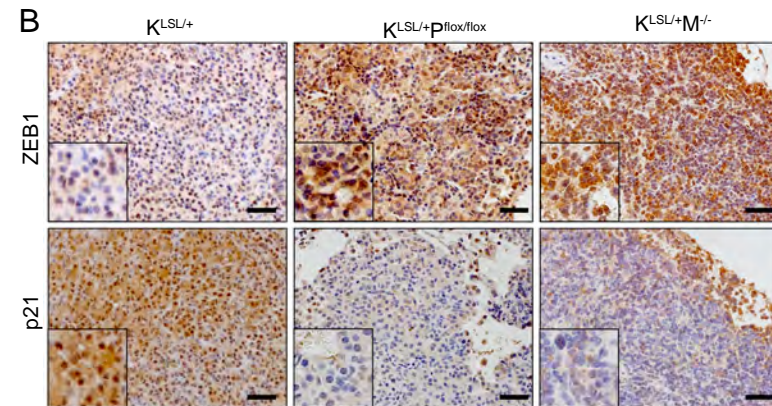

C

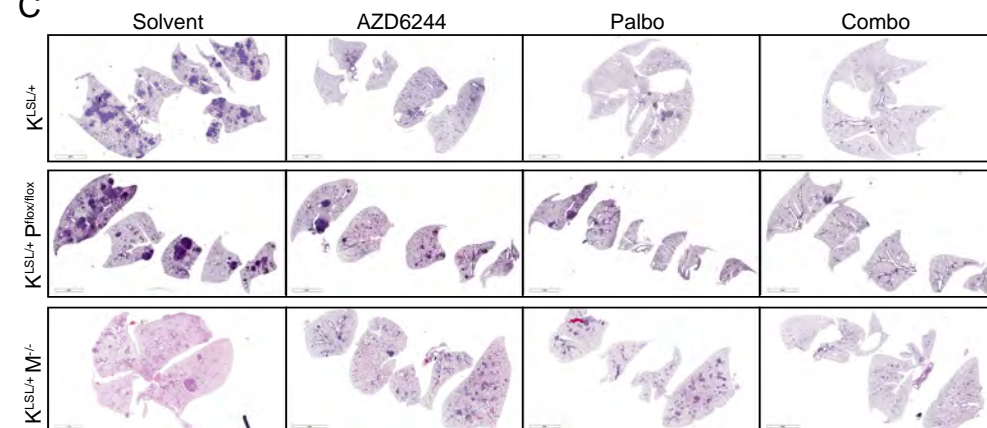

**Figure S11: Concomitant targeting of CDK4 and MAPK pathways augments response in *Kras* mutant autochthonous lung tumors.** (A) Schematic representation of *Kras*<sup>LSL/+</sup>, *Kras*<sup>LSL/+P<sup>flox/flox</sup></sup> and *Kras*<sup>LSL/+M<sup>-/-</sup></sup> before and after cre recombination. (B) Immunohistochemistry for indicated markers on *Kras*<sup>LSL/+</sup>, *Kras*<sup>LSL/+P<sup>flox/flox</sup></sup> and *Kras*<sup>LSL/+M<sup>-/-</sup></sup> lung sections 18-20 weeks post Ad-Cre infection. Scale bar: 50  $\mu$ m. (C) Hematoxylin and eosin (H&E) staining of whole lung section of *Kras*<sup>LSL/+</sup>, *Kras*<sup>LSL/+P<sup>flox/flox</sup></sup> and *Kras*<sup>LSL/+M<sup>-/-</sup></sup> 18-20 weeks post Ad-Cre infection.

Figure S12

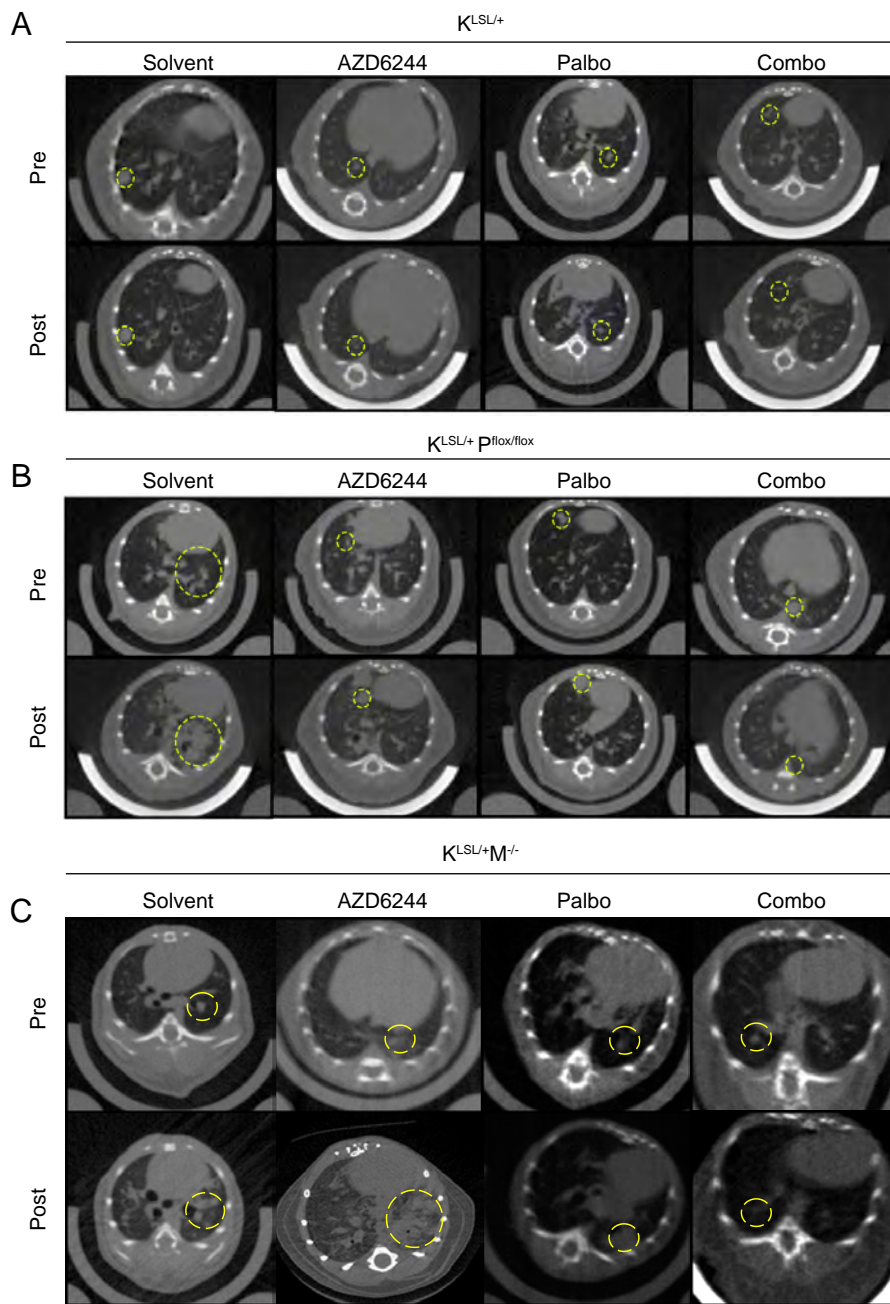

**Figure S12: Concomitant targeting of CDK4 and MAPK pathways augments response in Kras mutant autochthonous lung tumors.** (A) Representative cross-sectional micro-CT images of Kras<sup>LSL/+</sup>, Kras<sup>LSL/+P<sup>flox/flox</sup></sup> and Kras<sup>LSL/+M<sup>-/-</sup></sup> mouse lungs before and after treatment administration (6-8 weeks). Yellow circles outline representative target lesions.

**Table S1. Quality control metrics for the Kinome shRNA screens**

| reagent    | 393P    |        |       |          |       | 344P    |        |        |          |        |
|------------|---------|--------|-------|----------|-------|---------|--------|--------|----------|--------|
|            | in-vivo |        |       | in-vitro |       | in-vivo |        |        | in-vitro |        |
|            | 1       | 2      | 3     | 1        | 2     | 1       | 2      | 3      | 1        | 2      |
| LUC_10041  | 1.38    | 0.39   | -0.02 | 3.72     | 2.88  | 0.31    | 1.16   | 4.12   | 0.24     | 0.74   |
| LUC_10042  | -0.28   | 2.36   | 3.94  | -1.22    | 2.9   | -0.61   | -6.96  | 0.67   | 0.88     | 0.41   |
| LUC_10043  | -0.02   | 0.09   | -0.99 | 1.86     | 3.15  | 0.71    | 1.05   | 0.8    | 0.41     | 0.17   |
| LUC_10044  | 2.85    | 0.71   | 1.06  | 1.09     | 4.05  | -0.32   | -0.01  | 1.59   | 0.84     | 1.51   |
| LUC_10045  | 0.42    | 0.07   | 0.49  | 1.03     | 1.27  | 1.4     | 4.17   | 0      | 0.55     | 0.49   |
| LUC_10046  | -0.57   | -1.06  | -0.2  | -1.01    | -4.08 | 0.16    | 3.94   | 5.75   | -0.38    | 1.14   |
| LUC_10047  | -0.34   | 0.06   | 0.21  | -1.19    | -2.85 | 0.45    | 1.81   | 2.79   | 3.95     | 3.98   |
| LUC_10048  | 2.32    | 2.82   | 0.34  | 3.24     | 2.22  | -0.12   | 3.86   | 1.17   | 1.13     | 0.68   |
| LUC_10049  | 0.58    | 0.97   | 1.98  | 0.9      | 2.21  | 1.72    | 1.99   | 0.18   | 0.67     | 0.49   |
| LUC_10050  | -1.72   | -0.38  | -1.06 | -1.63    | 1.06  | -11.82  | -0.14  | -5.76  | 0.4      | 0.08   |
| LUC_10051  | 0.73    | 4.01   | 1.21  | 3.5      | 2.2   | -0.06   | 0.55   | -0.66  | -0.11    | 0.5    |
| LUC_10052  | 3.63    | -1.99  | 0.52  | 3.37     | 1.95  | -0.58   | 1.84   | -1.68  | 0.97     | 0.87   |
| LUC_10053  | 0.36    | 0.7    | 2.6   | 3.35     | 3.99  | 0.59    | -0.62  | -9.14  | 0.95     | 0.16   |
| LUC_10054  | -1.47   | 0.69   | -0.44 | -1.81    | 3.4   | -1.25   | 0.53   | -12.03 | 0.11     | 0.23   |
| LUC_10055  | -1.3    | -0.68  | -0.49 | -0.44    | -0.99 | 0.16    | 0.59   | 0.24   | 1.81     | 1.67   |
| LUC_10056  | -2.53   | -3.06  | -0.09 | -0.69    | -1.69 | -11.55  | -11.55 | -11.55 | -1.36    | -2.68  |
| LUC_10057  | 1.28    | 0.7    | -1.12 | 0.07     | 0.75  | 0.36    | 0.42   | -0.87  | 0.34     | 0.39   |
| LUC_10058  | -0.74   | -10.09 | -2.44 | -4.1     | -0.78 | 0.43    | 0.29   | -10.58 | -6.65    | -10.58 |
| LUC_10059  | -0.02   | -1.96  | -1.36 | -4.1     | -4.93 | 0.72    | -12.24 | -0.3   | -3.95    | -4.25  |
| LUC_10060  | -1.89   | -5.64  | -2.07 | -4.09    | -4.19 | -10.99  | -10.99 | -10.99 | -10.99   | -10.99 |
| Rpl30_1000 | -0.99   | 1.45   | -2.72 | -4.68    | -4.75 | 1.67    | -1.7   | -0.04  | -1.73    | -0.26  |
| Rpl30_1000 | -2.81   | -6.85  | -2.84 | -4.59    | -5.92 | -0.94   | -11.57 | -8.5   | -1.04    | -11.57 |
| Rpl30_1000 | 2.72    | -0.86  | -2.75 | -1.42    | 0.24  | -1.28   | 0.33   | -2.12  | -4.64    | -2.6   |
| Rpl30_1000 | -3.98   | -1     | -1.36 | -0.69    | -0.05 | -8.09   | -12.99 | -12.99 | -4.6     | -5.72  |
| Rpl30_1000 | -4.59   | -4.45  | -4.55 | -3.42    | -4.88 | -1.08   | -13.05 | -13.05 | -13.05   | -13.05 |
| Rpl30_1000 | 0.14    | -1.62  | -2.69 | -3.05    | -1.94 | -12.41  | 1.24   | -12.41 | -1.98    | -5.41  |
| Rpl30_1000 | -1.39   | -1.88  | -3.38 | -2.45    | -1.91 | -1.46   | -1.44  | -14.32 | -0.93    | -3.42  |
| Rpl30_1000 | -4.03   | -4.86  | -2.98 | -3.95    | -2.52 | -1.42   | -1.73  | -2.76  | -12.6    | -5.04  |
| Rpl30_1000 | -2.2    | -2     | -1.2  | -2.46    | 2.67  | -1.75   | -1.17  | -1.15  | -2.98    | -2.59  |
| Rpl30_1001 | 1.11    | -3.03  | -1.45 | -4.62    | -1.4  | -11.93  | -11.93 | -7.51  | -2.85    | -7.36  |
| Rpl30_1001 | -3.37   | -0.88  | -0.81 | -1.58    | -1.24 | -3.91   | -0.71  | -2.21  | -2.07    | -3.95  |
| Rpl30_1001 | -0.79   | -10.23 | -6.2  | -4.48    | -5.47 | -0.37   | -10.03 | 0.74   | -10.03   | -10.03 |
| Rpl30_1001 | -2.1    | -2.79  | -7.91 | -4.82    | -4.16 | -11.51  | -11.51 | -11.51 | -2.57    | 1.55   |
| Rpl30_1001 | -6.31   | -1.31  | -1.56 | -6.23    | -6.16 | -1.26   | -11.57 | 0.13   | -4.59    | -2.36  |
| Rpl30_1001 | -4.73   | -2.52  | -5.41 | -3.72    | -4.28 | -11.85  | -11.85 | -11.85 | -0.82    | -2.19  |
| Rpl30_1001 | -2.42   | -6.94  | 0.17  | -4.55    | -5.7  | -12.57  | -8.97  | -0.58  | -4.23    | -5.01  |
| Rpl30_1001 | -2.78   | -2.13  | -3.33 | 1.11     | -0.56 | -1.21   | -8.07  | 0.48   | -2.9     | -5.83  |
| Rpl30_1001 | -2.01   | 1.65   | -6.21 | -0.57    | -0.82 | -4.46   | 0.22   | -10.87 | -0.7     | -7.47  |
| Rpl30_1001 | -3.65   | -6.19  | -4.08 | -4.56    | -3.87 | -1.21   | -8.41  | 0.06   | -2.81    | -2.21  |
| Rpl30_1002 | -4.31   | -7.71  | -2.93 | 0.3      | -4.64 | -10.75  | -3.9   | -10.75 | -0.25    | -10.75 |
| Psma1_1002 | 0.48    | 1.8    | 0.46  | -3.37    | -2.48 | 0.97    | 2.85   | 3.32   | 0.9      | 1.26   |
| Psma1_1002 | 0.05    | 0.54   | 0.16  | -0.9     | -3.02 | 1.72    | 5.68   | 1.73   | 1.07     | 0.74   |
| Psma1_1002 | 0.67    | 1.09   | 0.55  | -1.03    | 0.68  | -1.27   | 0.63   | 0.97   | 1.45     | 1.84   |

|            |        |        |       |       |       |        |        |        |        |        |
|------------|--------|--------|-------|-------|-------|--------|--------|--------|--------|--------|
| Psma1_1002 | -0.14  | 0.52   | 0.63  | -1.45 | -0.04 | 3.48   | 1.4    | 2.77   | 0.76   | 0.9    |
| Psma1_1002 | 0.32   | 1.67   | 0.62  | -0.46 | -0.08 | 0.89   | 0.06   | 3.09   | 0.83   | 0.35   |
| Psma1_1002 | -2.71  | 0.77   | -2.09 | -5.09 | -5.23 | -2.62  | -11.47 | -11.47 | -6.42  | -6.66  |
| Psma1_1002 | -1.38  | -1.87  | -3.7  | -4.41 | -3.91 | -0.26  | 1.44   | -0.82  | -2.51  | -3.41  |
| Psma1_1002 | -1.6   | -2.28  | -3.82 | -4.57 | -2.51 | -0.53  | -1.47  | -11.63 | -11.63 | -11.63 |
| Psma1_1002 | -2.94  | -2.64  | -1.95 | -4.7  | -1.94 | -0.96  | -0.17  | -0.02  | -4.07  | -2.93  |
| Psma1_1003 | -5.53  | -2.56  | -5.78 | -4.23 | -4.39 | -10.91 | -10.91 | -10.91 | -10.91 | -10.91 |
| Psma1_1003 | -4.04  | 2.34   | -3.58 | -2.61 | -4.77 | -1.23  | -1.5   | -13.16 | -3.76  | -3.89  |
| Psma1_1003 | -5.03  | -3.91  | -2.96 | -4.66 | -4.11 | -1.4   | -3.85  | -1.65  | -2.82  | -2.18  |
| Psma1_1003 | -3.83  | -3.54  | -2.49 | -2.58 | -0.56 | -3.57  | 6.82   | -1.08  | -3.53  | -6.22  |
| Psma1_1003 | -1.81  | -1.99  | -7.37 | -4.93 | -4.59 | -7.15  | -11.13 | 0.94   | -11.13 | -11.13 |
| Psma1_1003 | -0.32  | 5.82   | -0.4  | 0.36  | -0.75 | -2.96  | -0.14  | -1.94  | -3.48  | -4.76  |
| Psma1_1003 | -10.25 | -10.25 | -1.74 | -3.73 | -4.29 | -11.08 | -11.08 | -11.08 | -11.08 | -11.08 |
| Psma1_1003 | -8.81  | -8.81  | -8.81 | -4.43 | -5.23 | -11.15 | -11.15 | -11.15 | -1.96  | -11.15 |
| Psma1_1003 | -6.37  | -6.37  | -6.37 | -3.65 | -6.37 | -10.44 | -10.44 | -10.44 | -10.44 | -10.44 |
| Psma1_1003 | -6.23  | -5.79  | -6.48 | -4.16 | -3.97 | 0.23   | -10.7  | -10.7  | -10.7  | -10.7  |
| Psma1_1004 | -1.85  | -5.17  | -3.4  | -4.68 | -4.3  | -10.76 | -10.76 | -10.76 | -10.76 | -10.76 |



**Table S2. Gene level dropout scores for each of the Kinome screens**

| model     | 393P  |      |            |      | 344P  |      |            |      |
|-----------|-------|------|------------|------|-------|------|------------|------|
|           | nude  |      | in-vitro.2 |      | nude  |      | in-vitro.2 |      |
| condition | logP  | rank | logP       | rank | logP  | rank | logP       | rank |
| metric    | logP  | rank | logP       | rank | logP  | rank | logP       | rank |
| Adrbk2    | -5.86 | 4    | -5.11      | 5    | -5.29 | 1    | -5.06      | 6    |
| Cdk4      | -4.98 | 7    | -0.33      | 432  | -5.04 | 2    | -7.40      | 2    |
| Csnk2a2   | -1.71 | 101  | -1.90      | 78   | -4.36 | 3    | -2.36      | 56   |
| Dapk3     | -3.43 | 21   | -0.12      | 490  | -4.29 | 4    | -1.84      | 108  |
| Wnk1      | -2.80 | 40   | -1.16      | 189  | -4.23 | 5    | -1.16      | 207  |
| Rps6kc1   | -1.57 | 117  | -1.47      | 129  | -4.07 | 6    | -4.67      | 9    |
| Btk       | -0.54 | 368  | -2.91      | 23   | -3.90 | 7    | -1.64      | 134  |
| Rps6ka5   | -1.64 | 106  | -2.21      | 54   | -3.90 | 8    | -1.22      | 194  |
| Kalrn     | -2.86 | 37   | -0.89      | 250  | -3.87 | 9    | -2.48      | 48   |
| Aurka     | -2.41 | 46   | -2.72      | 33   | -3.78 | 10   | -5.49      | 4    |
| Plk1      | -5.44 | 6    | -5.98      | 2    | -3.68 | 11   | -4.72      | 8    |
| Hipk4     | -0.18 | 474  | -0.46      | 392  | -3.64 | 12   | -0.43      | 396  |
| Bmpr1b    | -0.70 | 322  | -2.59      | 37   | -3.57 | 13   | -0.85      | 266  |
| Akt1      | -2.74 | 43   | -1.44      | 134  | -3.47 | 14   | -1.49      | 156  |
| Smg1      | -2.09 | 70   | -1.32      | 151  | -3.46 | 15   | -3.86      | 11   |
| Stk16     | -0.72 | 309  | -0.43      | 403  | -3.44 | 16   | -3.28      | 19   |
| Wnk2      | -1.20 | 178  | -1.04      | 216  | -3.43 | 17   | -3.16      | 21   |
| ErbB3     | -5.92 | 2    | -4.34      | 6    | -3.41 | 18   | -2.64      | 40   |
| Map2k5    | -3.58 | 18   | -2.47      | 43   | -3.28 | 19   | -5.97      | 3    |
| Raf1      | -5.50 | 5    | -4.30      | 7    | -3.28 | 20   | -1.66      | 132  |
| Flt4      | -1.27 | 163  | -2.10      | 62   | -3.22 | 21   | -3.69      | 14   |
| Fes       | -4.09 | 12   | -2.86      | 27   | -3.13 | 22   | -1.64      | 136  |
| Nek7      | -4.06 | 13   | -3.21      | 18   | -3.07 | 23   | -1.64      | 135  |
| Akt3      | -2.30 | 53   | -1.67      | 110  | -3.01 | 24   | -0.79      | 286  |
| Wnk3      | -0.32 | 438  | -0.61      | 335  | -2.99 | 25   | -0.97      | 242  |
| Rps6ka6   | -2.41 | 45   | -3.46      | 14   | -2.95 | 26   | -2.17      | 70   |
| Pomk      | -0.48 | 383  | -1.30      | 155  | -2.87 | 27   | -1.25      | 183  |
| Mtor      | -3.79 | 16   | -5.49      | 4    | -2.87 | 28   | -2.52      | 45   |
| Bub1b     | -2.90 | 35   | -3.56      | 12   | -2.84 | 29   | -3.62      | 15   |
| Pik3cg    | -0.16 | 482  | -0.05      | 505  | -2.74 | 30   | -0.90      | 255  |
| Stk35     | -0.79 | 275  | -1.38      | 143  | -2.68 | 31   | -0.77      | 291  |
| Mark3     | -2.31 | 52   | -0.66      | 315  | -2.68 | 32   | -1.71      | 122  |
| Csnk1e    | -2.38 | 48   | -2.11      | 59   | -2.63 | 33   | -1.61      | 139  |
| Jak1      | -1.65 | 105  | -2.42      | 45   | -2.59 | 34   | -0.84      | 268  |
| Nrbp1     | -3.29 | 25   | -1.79      | 92   | -2.58 | 35   | -1.67      | 130  |
| Ttk       | -1.32 | 153  | -3.17      | 19   | -2.54 | 36   | -2.73      | 36   |
| Tnik      | -1.55 | 124  | -1.85      | 82   | -2.54 | 37   | -0.49      | 378  |
| Prkdc     | -0.91 | 242  | -0.86      | 257  | -2.53 | 38   | -2.02      | 86   |
| Map3k7    | -0.39 | 414  | -0.04      | 509  | -2.47 | 39   | -0.10      | 488  |
| Akt2      | -1.57 | 121  | -6.37      | 1    | -2.46 | 40   | -2.13      | 75   |
| Cdkl4     | -0.66 | 336  | -0.59      | 342  | -2.46 | 41   | -0.38      | 417  |
| Pik3ca    | -3.82 | 15   | -1.06      | 211  | -2.45 | 42   | -4.31      | 10   |

|          |       |     |       |     |       |    |       |     |
|----------|-------|-----|-------|-----|-------|----|-------|-----|
| Pkn2     | -1.87 | 85  | -1.93 | 75  | -2.43 | 43 | -2.88 | 30  |
| Bckdk    | -0.97 | 230 | -1.70 | 105 | -2.35 | 44 | -2.31 | 57  |
| Adck4    | -1.08 | 202 | -1.78 | 94  | -2.30 | 45 | -2.30 | 58  |
| Eif2ak3  | -1.28 | 162 | -1.29 | 159 | -2.30 | 46 | -3.17 | 20  |
| Pi4ka    | -0.77 | 289 | -0.44 | 400 | -2.29 | 47 | -2.05 | 83  |
| Atr      | -5.98 | 1   | -3.94 | 9   | -2.27 | 48 | -7.69 | 1   |
| Stk38    | -2.06 | 74  | -1.01 | 223 | -2.25 | 49 | -0.92 | 249 |
| Snrk     | -2.09 | 69  | -1.88 | 79  | -2.24 | 50 | -1.96 | 93  |
| Pask     | -1.58 | 115 | -2.56 | 40  | -2.23 | 51 | -0.52 | 365 |
| Sik3     | -2.14 | 64  | -1.42 | 140 | -2.23 | 52 | -1.55 | 145 |
| Cask     | -2.00 | 78  | -1.99 | 69  | -2.22 | 53 | -1.54 | 148 |
| Mapk12   | -0.46 | 390 | -0.41 | 414 | -2.19 | 54 | -1.73 | 120 |
| Lats1    | -0.70 | 321 | -0.70 | 304 | -2.19 | 55 | -1.06 | 228 |
| Gsg2     | -1.58 | 114 | -1.98 | 72  | -2.17 | 56 | -1.14 | 211 |
| Mark1    | -1.29 | 159 | -2.03 | 67  | -2.17 | 57 | -2.44 | 51  |
| Pak2     | -1.19 | 181 | -3.85 | 10  | -2.16 | 58 | -1.89 | 101 |
| Mapk7    | -0.59 | 360 | -0.90 | 246 | -2.16 | 59 | -1.48 | 158 |
| Prkg1    | -2.86 | 38  | -0.70 | 302 | -2.14 | 60 | -1.00 | 236 |
| Ryk      | -3.74 | 17  | -1.05 | 214 | -2.14 | 61 | -3.84 | 12  |
| Map3k6   | -2.27 | 56  | -0.35 | 427 | -2.13 | 62 | -2.44 | 52  |
| Mastl    | -1.19 | 183 | -0.96 | 234 | -2.13 | 63 | -1.55 | 146 |
| Stk3     | -1.79 | 93  | -1.25 | 170 | -2.13 | 64 | -1.98 | 90  |
| Rps6kl1  | -1.46 | 137 | -0.32 | 434 | -2.12 | 65 | -2.10 | 80  |
| Prkcg    | -1.90 | 82  | -1.30 | 156 | -2.11 | 66 | -0.54 | 360 |
| Cdk10    | -1.30 | 157 | -0.58 | 349 | -2.10 | 67 | -1.80 | 111 |
| Ntrk1    | -0.04 | 513 | -0.48 | 382 | -2.10 | 68 | -0.02 | 515 |
| Ripk4    | -0.63 | 346 | -0.82 | 269 | -2.10 | 69 | -1.99 | 88  |
| Mapk6    | -0.85 | 256 | -1.43 | 136 | -2.10 | 70 | -1.52 | 150 |
| Pxk      | -1.74 | 99  | -2.07 | 64  | -2.09 | 71 | -1.75 | 118 |
| Camk1d   | -0.80 | 271 | -0.48 | 384 | -2.09 | 72 | -0.86 | 263 |
| Yes1     | -3.37 | 23  | -0.90 | 245 | -2.05 | 73 | -1.78 | 113 |
| Prkab2   | -1.08 | 198 | -0.63 | 326 | -2.04 | 74 | -3.82 | 13  |
| Nek3     | -2.74 | 42  | -0.96 | 233 | -2.04 | 75 | -2.52 | 44  |
| Musk     | -0.73 | 304 | -0.43 | 402 | -2.03 | 76 | -3.10 | 23  |
| Riok2    | -0.80 | 272 | -0.64 | 322 | -2.03 | 77 | -1.63 | 137 |
| Vrk1     | -1.21 | 170 | -0.48 | 383 | -2.02 | 78 | -0.05 | 506 |
| Pink1    | -0.78 | 283 | -3.26 | 16  | -2.02 | 79 | -3.07 | 24  |
| Cdk6     | -1.49 | 134 | -0.87 | 255 | -2.01 | 80 | -2.18 | 67  |
| LUC      | -0.78 | 278 | -1.24 | 173 | -2.00 | 81 | -1.61 | 140 |
| Mapkapk5 | -0.30 | 443 | -1.70 | 106 | -1.98 | 82 | -1.92 | 95  |
| Mapk9    | -2.07 | 71  | -1.98 | 73  | -1.96 | 83 | -1.92 | 97  |
| Bmp2k    | -1.46 | 138 | -0.89 | 251 | -1.96 | 84 | -2.52 | 47  |
| Epha5    | -2.24 | 58  | -1.83 | 86  | -1.95 | 85 | -1.77 | 114 |
| Prkd3    | -1.87 | 84  | -0.22 | 466 | -1.94 | 86 | -0.63 | 332 |
| Ern1     | -1.19 | 180 | -3.62 | 11  | -1.93 | 87 | -0.51 | 372 |
| Sik1     | -0.30 | 445 | -0.42 | 404 | -1.93 | 88 | -0.65 | 326 |
| Prkcd    | -4.60 | 9   | -2.87 | 26  | -1.89 | 89 | -2.54 | 43  |

|         |       |     |       |     |       |     |       |     |
|---------|-------|-----|-------|-----|-------|-----|-------|-----|
| Nek1    | -1.75 | 96  | -4.30 | 8   | -1.88 | 90  | -1.97 | 92  |
| Trrap   | -3.31 | 24  | -3.26 | 17  | -1.88 | 91  | -2.03 | 84  |
| Cnksr1  | -0.25 | 456 | -0.60 | 341 | -1.88 | 92  | -1.53 | 149 |
| Mylk    | -1.58 | 116 | -0.27 | 449 | -1.84 | 93  | -1.25 | 184 |
| Map2k6  | -0.31 | 440 | -0.66 | 316 | -1.84 | 94  | -1.38 | 167 |
| Mast1   | -3.50 | 19  | -0.52 | 366 | -1.84 | 95  | -0.83 | 270 |
| Map2k2  | -1.19 | 182 | -1.43 | 138 | -1.83 | 96  | -0.56 | 352 |
| Map3k13 | -0.14 | 491 | -2.73 | 32  | -1.82 | 97  | -0.23 | 456 |
| Epha1   | -1.05 | 213 | -0.83 | 266 | -1.81 | 98  | -0.64 | 327 |
| Nek9    | -1.36 | 148 | -2.43 | 44  | -1.81 | 99  | -2.79 | 32  |
| Epha4   | -0.71 | 315 | -1.03 | 219 | -1.80 | 100 | -0.40 | 408 |
| Egfr    | -1.86 | 87  | -1.07 | 207 | -1.79 | 101 | -3.12 | 22  |
| Dstyk   | -1.06 | 205 | -0.28 | 441 | -1.79 | 102 | -1.23 | 191 |
| Ddr1    | -0.85 | 257 | -1.19 | 183 | -1.78 | 103 | -2.14 | 72  |
| Fgfr4   | -2.41 | 47  | -2.78 | 29  | -1.77 | 104 | -2.66 | 38  |
| Trib1   | -1.57 | 120 | -1.25 | 169 | -1.76 | 105 | -1.22 | 193 |
| Chek1   | -0.94 | 235 | -1.10 | 199 | -1.76 | 106 | -1.45 | 161 |
| Camk2a  | -1.82 | 88  | -1.27 | 161 | -1.76 | 107 | -0.87 | 259 |
| Prkci   | -0.24 | 460 | -1.06 | 209 | -1.75 | 108 | -0.80 | 278 |
| Map3k5  | -0.55 | 367 | -0.59 | 344 | -1.75 | 109 | -1.50 | 153 |
| Met     | -0.70 | 323 | -0.37 | 424 | -1.75 | 110 | -0.13 | 479 |
| Cdk7    | -0.39 | 415 | -0.05 | 504 | -1.74 | 111 | -0.45 | 389 |
| Ptk2    | -1.33 | 151 | -1.29 | 158 | -1.71 | 112 | -3.02 | 27  |
| Camkk1  | -0.74 | 301 | -0.96 | 235 | -1.71 | 113 | -0.59 | 343 |
| Ulk1    | -2.22 | 61  | -0.63 | 330 | -1.70 | 114 | -0.42 | 403 |
| Zap70   | -1.07 | 203 | -0.80 | 277 | -1.68 | 115 | -0.68 | 318 |
| Srp3    | -1.06 | 204 | -1.04 | 217 | -1.68 | 116 | -0.44 | 395 |
| Map3k14 | -1.21 | 175 | -0.73 | 297 | -1.67 | 117 | -1.01 | 235 |
| Crkl    | -0.50 | 379 | -0.82 | 268 | -1.67 | 118 | -1.26 | 181 |
| Aatk    | -1.63 | 108 | -1.04 | 215 | -1.66 | 119 | -1.27 | 179 |
| Pik3r3  | -0.37 | 423 | -0.02 | 514 | -1.66 | 120 | -0.57 | 350 |
| Cdk8    | -1.24 | 166 | -2.08 | 63  | -1.66 | 121 | -2.13 | 74  |
| Axl     | -0.96 | 231 | -0.67 | 313 | -1.65 | 122 | -0.62 | 335 |
| Ddr2    | -0.49 | 381 | -1.05 | 212 | -1.65 | 123 | -1.11 | 219 |
| Sgk2    | -1.00 | 218 | -0.24 | 462 | -1.64 | 124 | -0.63 | 331 |
| Mok     | -4.38 | 10  | -1.84 | 83  | -1.63 | 125 | -1.83 | 110 |
| Epha6   | -0.77 | 291 | -1.16 | 193 | -1.62 | 126 | -2.19 | 64  |
| Stk32c  | -2.80 | 41  | -1.29 | 160 | -1.62 | 127 | -0.88 | 258 |
| Rps6ka4 | -0.93 | 238 | -2.50 | 41  | -1.61 | 128 | -1.43 | 163 |
| Sik2    | -0.91 | 244 | -1.07 | 208 | -1.60 | 129 | -1.15 | 209 |
| Csk     | -0.19 | 467 | -0.66 | 317 | -1.58 | 130 | -0.86 | 265 |
| Mknk1   | -1.12 | 191 | -0.59 | 346 | -1.55 | 131 | -0.60 | 339 |
| Adck5   | -3.48 | 20  | -2.57 | 39  | -1.54 | 132 | -1.16 | 206 |
| Rock2   | -0.76 | 295 | -0.91 | 241 | -1.52 | 133 | -0.45 | 388 |
| Frk     | -1.21 | 172 | -2.18 | 55  | -1.51 | 134 | -0.89 | 256 |
| Map4k1  | -0.71 | 313 | -1.02 | 222 | -1.49 | 135 | -1.12 | 217 |
| Ret     | -0.10 | 496 | -0.35 | 428 | -1.48 | 136 | -0.37 | 418 |

|         |       |     |       |     |       |     |       |     |
|---------|-------|-----|-------|-----|-------|-----|-------|-----|
| Map3k2  | -2.35 | 51  | -1.56 | 120 | -1.48 | 137 | -0.25 | 449 |
| Gm711   | -1.10 | 193 | -1.90 | 76  | -1.47 | 138 | -1.18 | 200 |
| Camk4   | -0.52 | 373 | -0.21 | 472 | -1.47 | 139 | -1.27 | 177 |
| Alpk3   | -2.02 | 77  | -0.51 | 372 | -1.46 | 140 | -0.18 | 469 |
| Araf    | -1.51 | 130 | -0.53 | 363 | -1.45 | 141 | -0.99 | 239 |
| Bmpr2   | -0.77 | 290 | -2.33 | 49  | -1.45 | 142 | -2.71 | 37  |
| Npr2    | -0.68 | 329 | -0.48 | 381 | -1.44 | 143 | -0.91 | 253 |
| Kdr     | -0.28 | 449 | -0.58 | 350 | -1.44 | 144 | -2.96 | 29  |
| Mst1r   | -1.28 | 161 | -0.31 | 436 | -1.44 | 145 | -0.92 | 251 |
| Txk     | -0.50 | 378 | -0.48 | 385 | -1.43 | 146 | -2.18 | 68  |
| Stk17b  | -0.70 | 324 | -0.28 | 442 | -1.42 | 147 | -0.16 | 474 |
| Cdk16   | -0.96 | 232 | -1.19 | 184 | -1.42 | 148 | -2.29 | 60  |
| Pkn1    | -0.91 | 241 | -1.38 | 144 | -1.41 | 149 | -2.19 | 65  |
| Csnk1d  | -0.38 | 421 | -0.54 | 361 | -1.41 | 150 | -0.55 | 354 |
| Hipk3   | -0.99 | 224 | -1.56 | 119 | -1.41 | 151 | -0.79 | 280 |
| Stk33   | -1.68 | 104 | -0.90 | 243 | -1.41 | 152 | -0.78 | 288 |
| Ripk3   | -0.10 | 500 | -1.21 | 178 | -1.40 | 153 | -1.52 | 151 |
| Bub1    | -1.62 | 109 | -2.12 | 57  | -1.37 | 154 | -1.19 | 198 |
| Plk4    | -0.83 | 264 | -1.45 | 132 | -1.37 | 155 | -2.07 | 81  |
| Mos     | -0.60 | 357 | -1.79 | 93  | -1.37 | 156 | -1.57 | 143 |
| Pdpk1   | -2.84 | 39  | -2.70 | 34  | -1.37 | 157 | -2.37 | 55  |
| Cdk11b  | -1.41 | 145 | -1.76 | 97  | -1.36 | 158 | -1.83 | 109 |
| Mark4   | -1.52 | 128 | -0.80 | 274 | -1.35 | 159 | -3.00 | 28  |
| Pak7    | -0.92 | 239 | -0.63 | 331 | -1.35 | 160 | -1.25 | 182 |
| Mapk8   | -1.50 | 133 | -0.65 | 319 | -1.35 | 161 | -1.13 | 215 |
| Aurkb   | -4.96 | 8   | -1.45 | 133 | -1.35 | 162 | -5.47 | 5   |
| Dapk1   | -1.76 | 95  | -0.26 | 451 | -1.34 | 163 | -1.31 | 173 |
| Styk1   | -1.73 | 100 | -0.37 | 421 | -1.34 | 164 | -2.28 | 61  |
| Stk40   | -1.57 | 118 | -0.51 | 373 | -1.33 | 165 | -1.49 | 154 |
| Map3k9  | -0.40 | 412 | -0.48 | 380 | -1.33 | 166 | -0.10 | 487 |
| Prkch   | -0.69 | 328 | -0.77 | 285 | -1.32 | 167 | -0.31 | 436 |
| Csnk1g1 | -0.08 | 504 | -1.16 | 191 | -1.32 | 168 | -0.75 | 302 |
| Blk     | -1.43 | 142 | -1.26 | 167 | -1.31 | 169 | -1.35 | 170 |
| Pim3    | -1.29 | 160 | -0.62 | 332 | -1.31 | 170 | -2.14 | 73  |
| Fgr     | -0.88 | 251 | -0.72 | 299 | -1.31 | 171 | -0.76 | 297 |
| Pdgfrb  | -1.49 | 135 | -0.83 | 265 | -1.30 | 172 | -0.31 | 438 |
| Nek11   | -1.87 | 83  | -0.21 | 471 | -1.30 | 173 | -2.39 | 53  |
| Trib2   | -1.45 | 140 | -1.15 | 194 | -1.30 | 174 | -0.53 | 363 |
| Tbk1    | -1.55 | 125 | -2.33 | 50  | -1.30 | 175 | -2.02 | 85  |
| Limk1   | -0.45 | 393 | -0.30 | 439 | -1.30 | 176 | -0.09 | 491 |
| Sbk1    | -1.44 | 141 | -1.23 | 174 | -1.29 | 177 | -0.51 | 373 |
| Ikbkb   | -0.80 | 274 | -0.51 | 375 | -1.29 | 178 | -1.75 | 117 |
| Tex14   | -4.20 | 11  | -1.34 | 148 | -1.28 | 179 | -1.14 | 210 |
| Jak2    | -3.25 | 26  | -2.26 | 52  | -1.28 | 180 | -1.94 | 94  |
| Prkd2   | -0.93 | 237 | -0.99 | 228 | -1.28 | 181 | -2.45 | 50  |
| Mapk14  | -2.38 | 49  | -1.57 | 117 | -1.27 | 182 | -0.77 | 289 |
| Stk32b  | -1.57 | 122 | -1.32 | 153 | -1.27 | 183 | -1.37 | 168 |

|         |       |     |       |     |       |     |       |     |
|---------|-------|-----|-------|-----|-------|-----|-------|-----|
| Nim1k   | -1.24 | 167 | -1.36 | 145 | -1.26 | 184 | -1.17 | 202 |
| Lrrk2   | -1.51 | 129 | -2.61 | 36  | -1.25 | 185 | -0.81 | 274 |
| Map4k3  | -3.08 | 29  | -1.43 | 137 | -1.24 | 186 | -0.62 | 333 |
| Mapk1   | -0.83 | 263 | -2.88 | 24  | -1.21 | 187 | -0.26 | 445 |
| Pik3c3  | -0.59 | 361 | -0.64 | 321 | -1.21 | 188 | -0.54 | 361 |
| Cdk9    | -2.22 | 60  | -1.11 | 196 | -1.21 | 189 | -0.47 | 385 |
| Phkg2   | -0.21 | 465 | -0.13 | 488 | -1.20 | 190 | -2.10 | 77  |
| Lmtk2   | -0.47 | 388 | -0.24 | 463 | -1.20 | 191 | -1.03 | 230 |
| Mapk15  | -3.08 | 30  | -1.30 | 157 | -1.19 | 192 | -0.93 | 247 |
| Eif2ak4 | -0.97 | 228 | -1.10 | 198 | -1.18 | 193 | -0.48 | 381 |
| Cdkl5   | -0.72 | 308 | -0.25 | 459 | -1.18 | 194 | -1.22 | 196 |
| Mapk4   | -5.86 | 3   | -0.64 | 324 | -1.17 | 195 | -0.48 | 382 |
| Fastk   | -0.83 | 262 | -1.16 | 190 | -1.17 | 196 | -1.74 | 119 |
| Riok1   | -3.02 | 32  | -2.88 | 25  | -1.17 | 197 | -3.39 | 18  |
| Irak2   | -1.61 | 110 | -0.90 | 247 | -1.15 | 198 | -1.88 | 103 |
| Fgfr1   | -0.64 | 340 | -0.39 | 417 | -1.14 | 199 | -0.68 | 320 |
| Fert2   | -1.09 | 195 | -0.77 | 281 | -1.13 | 200 | -0.20 | 462 |
| Ulk4    | -0.66 | 337 | -0.54 | 362 | -1.13 | 201 | -0.33 | 428 |
| Erb2    | -3.02 | 31  | -1.27 | 163 | -1.12 | 202 | -1.20 | 197 |
| Mast4   | -0.57 | 366 | -0.26 | 452 | -1.12 | 203 | -0.77 | 290 |
| Nek8    | -0.13 | 493 | -2.73 | 31  | -1.12 | 204 | -1.75 | 116 |
| Trib3   | -2.11 | 68  | -1.27 | 162 | -1.11 | 205 | -0.79 | 281 |
| Map3k11 | -0.32 | 434 | -1.04 | 218 | -1.11 | 206 | -1.18 | 201 |
| Epha10  | -1.18 | 184 | -0.91 | 242 | -1.11 | 207 | -1.42 | 164 |
| Scyl2   | -1.08 | 197 | -2.11 | 60  | -1.11 | 208 | -0.80 | 277 |
| Insr    | -2.13 | 65  | -0.52 | 368 | -1.11 | 209 | -0.87 | 262 |
| Ttbk1   | -0.33 | 433 | -0.81 | 271 | -1.09 | 210 | -0.76 | 298 |
| Sgk3    | -1.13 | 189 | -0.59 | 347 | -1.09 | 211 | -0.33 | 431 |
| Tec     | -1.50 | 132 | -0.86 | 258 | -1.08 | 212 | -2.19 | 66  |
| Nrk     | -0.78 | 281 | -0.30 | 438 | -1.08 | 213 | -0.50 | 375 |
| Stk19   | -2.07 | 72  | -0.41 | 413 | -1.07 | 214 | -2.25 | 63  |
| Epha3   | -0.41 | 409 | -2.59 | 38  | -1.06 | 215 | -2.29 | 59  |
| Riok3   | -0.74 | 298 | -1.03 | 220 | -1.06 | 216 | -1.98 | 89  |
| Ror2    | -0.99 | 222 | -1.75 | 98  | -1.05 | 217 | -2.10 | 78  |
| Map3k19 | -0.86 | 254 | -1.09 | 204 | -1.05 | 218 | -1.54 | 147 |
| Pim1    | -0.64 | 342 | -1.42 | 139 | -1.05 | 219 | -1.51 | 152 |
| Strada  | -0.72 | 310 | -0.63 | 329 | -1.05 | 220 | -0.05 | 505 |
| Ttbk2   | -1.48 | 136 | -0.77 | 283 | -1.05 | 221 | -1.26 | 180 |
| Pskh1   | -1.80 | 90  | -2.29 | 51  | -1.03 | 222 | -1.69 | 125 |
| Tssk6   | -1.74 | 98  | -1.34 | 149 | -1.03 | 223 | -2.00 | 87  |
| Ulk2    | -1.34 | 149 | -2.84 | 28  | -1.03 | 224 | -0.88 | 257 |
| Hunk    | -0.53 | 372 | -1.16 | 188 | -1.03 | 225 | -1.69 | 126 |
| Wee1    | -3.17 | 27  | -5.74 | 3   | -1.02 | 226 | -1.91 | 98  |
| Mknk2   | -0.70 | 319 | -0.10 | 498 | -1.02 | 227 | -0.79 | 284 |
| Aak1    | -1.11 | 192 | -1.32 | 152 | -1.02 | 228 | -1.13 | 213 |
| Chek2   | -0.88 | 252 | -0.23 | 465 | -1.02 | 229 | -1.88 | 102 |
| Pbk     | -0.40 | 410 | -0.37 | 425 | -1.02 | 230 | -0.76 | 295 |

|          |       |     |       |     |       |     |       |     |
|----------|-------|-----|-------|-----|-------|-----|-------|-----|
| Dclk3    | -1.03 | 215 | -0.42 | 406 | -1.01 | 231 | -1.00 | 238 |
| Braf     | -0.73 | 307 | -1.96 | 74  | -1.01 | 232 | -0.18 | 466 |
| Mylk4    | -0.78 | 277 | -0.58 | 352 | -1.00 | 233 | -0.74 | 304 |
| Cdkl2    | -0.26 | 453 | -0.95 | 236 | -1.00 | 234 | -1.24 | 186 |
| Ilk      | -2.94 | 33  | -1.36 | 146 | -1.00 | 235 | -1.68 | 128 |
| Prkca    | -0.58 | 362 | -0.54 | 358 | -1.00 | 236 | -0.57 | 351 |
| Mapk13   | -0.75 | 296 | -3.51 | 13  | -0.98 | 237 | -1.03 | 232 |
| Myo3b    | -0.45 | 391 | -1.78 | 95  | -0.98 | 238 | -1.22 | 195 |
| Ern2     | -1.80 | 89  | -1.81 | 89  | -0.98 | 239 | -3.05 | 25  |
| Taf1     | -2.35 | 50  | -2.11 | 58  | -0.97 | 240 | -0.80 | 275 |
| Nek10    | -0.71 | 318 | -1.05 | 213 | -0.97 | 241 | -0.55 | 355 |
| Hipk2    | -1.06 | 208 | -1.74 | 100 | -0.97 | 242 | -1.11 | 218 |
| Cdk14    | -0.42 | 401 | -0.07 | 502 | -0.96 | 243 | -0.74 | 303 |
| Ripk1    | -0.52 | 374 | -0.24 | 461 | -0.96 | 244 | -1.23 | 189 |
| Dclk2    | -0.18 | 476 | -0.75 | 293 | -0.96 | 245 | -0.08 | 500 |
| Tnni3k   | -1.77 | 94  | -2.37 | 47  | -0.96 | 246 | -0.72 | 308 |
| Matk     | -0.90 | 247 | -0.34 | 429 | -0.96 | 247 | -1.09 | 223 |
| Trpm6    | -1.21 | 174 | -0.87 | 254 | -0.95 | 248 | -0.21 | 458 |
| Tesk2    | -1.64 | 107 | -0.52 | 367 | -0.95 | 249 | -0.48 | 380 |
| Stk24    | -0.97 | 229 | -0.78 | 279 | -0.95 | 250 | -0.06 | 502 |
| Acvr1c   | -0.96 | 233 | -0.77 | 282 | -0.95 | 251 | -2.83 | 31  |
| Tssk4    | -0.41 | 406 | -0.49 | 379 | -0.94 | 252 | -1.06 | 227 |
| Acvr2a   | -0.74 | 299 | -0.51 | 371 | -0.94 | 253 | -0.61 | 338 |
| Alk      | -1.32 | 155 | -1.74 | 101 | -0.94 | 254 | -1.23 | 190 |
| Irak4    | -2.51 | 44  | -0.76 | 287 | -0.93 | 255 | -1.62 | 138 |
| Fgfr2    | -0.59 | 359 | -0.79 | 278 | -0.93 | 256 | -2.18 | 69  |
| Stk11    | -1.71 | 102 | -0.42 | 409 | -0.93 | 257 | -0.33 | 430 |
| Amhr2    | -0.38 | 420 | -1.40 | 141 | -0.93 | 258 | -0.34 | 424 |
| Cdk20    | -1.08 | 201 | -1.87 | 80  | -0.92 | 259 | -2.78 | 33  |
| Itk      | -0.34 | 427 | -1.09 | 203 | -0.91 | 260 | -1.07 | 226 |
| Map3k10  | -2.89 | 36  | -1.31 | 154 | -0.90 | 261 | -2.05 | 82  |
| Dyrk2    | -0.39 | 418 | -0.67 | 310 | -0.90 | 262 | -0.39 | 409 |
| Map2k3   | -1.33 | 152 | -0.31 | 437 | -0.90 | 263 | -0.54 | 356 |
| Ptk2b    | -0.71 | 312 | -1.01 | 224 | -0.90 | 264 | -0.59 | 344 |
| Mast3    | -0.67 | 332 | -0.47 | 387 | -0.89 | 265 | -0.58 | 347 |
| Cdc42bpb | -0.35 | 426 | -0.38 | 420 | -0.89 | 266 | -0.93 | 246 |
| Cdk12    | -0.65 | 338 | -0.15 | 484 | -0.89 | 267 | -0.37 | 419 |
| Nek2     | -1.06 | 206 | -0.93 | 239 | -0.88 | 268 | -0.72 | 307 |
| Srms     | -0.14 | 488 | -0.11 | 493 | -0.88 | 269 | -0.35 | 422 |
| Sbk2     | -0.62 | 350 | -0.81 | 272 | -0.87 | 270 | -1.91 | 99  |
| Nuak1    | -2.24 | 59  | -0.47 | 388 | -0.87 | 271 | -0.33 | 426 |
| Twf1     | -1.60 | 111 | -0.28 | 445 | -0.86 | 272 | -0.87 | 261 |
| Ikbke    | -0.69 | 325 | -1.27 | 165 | -0.85 | 273 | -2.65 | 39  |
| Scyl1    | -1.54 | 126 | -0.67 | 311 | -0.85 | 274 | -1.60 | 141 |
| Wnk4     | -1.79 | 91  | -1.00 | 227 | -0.83 | 275 | -0.22 | 457 |
| BC021891 | -0.39 | 419 | -0.44 | 398 | -0.83 | 276 | -1.41 | 165 |
| Gucy2f   | -1.26 | 164 | -1.82 | 88  | -0.83 | 277 | -2.54 | 42  |

|           |       |     |       |     |       |     |       |     |
|-----------|-------|-----|-------|-----|-------|-----|-------|-----|
| Tlk2      | -1.56 | 123 | -1.47 | 128 | -0.83 | 278 | -2.11 | 76  |
| Grk6      | -0.38 | 422 | -0.12 | 492 | -0.83 | 279 | -0.08 | 497 |
| Ankk1     | -0.84 | 258 | -1.09 | 205 | -0.82 | 280 | -0.69 | 316 |
| Stk36     | -2.06 | 73  | -1.54 | 125 | -0.80 | 281 | -1.24 | 187 |
| Pdk1      | -1.20 | 179 | -2.10 | 61  | -0.80 | 282 | -0.91 | 252 |
| Hipk1     | -1.94 | 80  | -0.64 | 323 | -0.79 | 283 | -2.63 | 41  |
| Ulk3      | -2.28 | 55  | -1.19 | 180 | -0.78 | 284 | -1.79 | 112 |
| Eif2ak1   | -0.28 | 452 | -0.14 | 486 | -0.78 | 285 | -0.09 | 494 |
| Mapk11    | -0.31 | 442 | -0.49 | 378 | -0.78 | 286 | -0.64 | 330 |
| D8Ertd82e | -0.37 | 424 | -0.18 | 479 | -0.77 | 287 | -0.17 | 472 |
| Tesk1     | -0.74 | 303 | -0.23 | 464 | -0.77 | 288 | -0.15 | 475 |
| Lats2     | -0.30 | 444 | -0.89 | 249 | -0.77 | 289 | -1.48 | 157 |
| Obscn     | -0.68 | 331 | -0.71 | 301 | -0.77 | 290 | -0.21 | 460 |
| Pkn3      | -0.41 | 404 | -0.40 | 416 | -0.77 | 291 | -0.28 | 443 |
| Rps6kb2   | -2.18 | 63  | -2.92 | 22  | -0.77 | 292 | -2.10 | 79  |
| Lmtk3     | -1.57 | 119 | -1.63 | 115 | -0.76 | 293 | -0.46 | 386 |
| Mink1     | -0.86 | 253 | -0.80 | 276 | -0.76 | 294 | -0.75 | 301 |
| Plk3      | -2.25 | 57  | -0.45 | 397 | -0.76 | 295 | -2.46 | 49  |
| Tek       | -1.01 | 217 | -0.45 | 395 | -0.76 | 296 | -1.76 | 115 |
| Pkdcc     | -0.85 | 255 | -1.18 | 185 | -0.74 | 297 | -2.77 | 34  |
| Trio      | -0.59 | 358 | -0.21 | 470 | -0.74 | 298 | -2.26 | 62  |
| Trp53rk   | -0.78 | 282 | -0.77 | 284 | -0.74 | 299 | -2.16 | 71  |
| Pdk4      | -3.42 | 22  | -1.54 | 124 | -0.74 | 300 | -0.51 | 369 |
| Kit       | -0.12 | 494 | -0.75 | 291 | -0.73 | 301 | -0.71 | 310 |
| Fgfr3     | -0.58 | 365 | -0.81 | 270 | -0.73 | 302 | -0.80 | 276 |
| Limk2     | -0.91 | 245 | -0.13 | 489 | -0.73 | 303 | -0.96 | 244 |
| Adck2     | -0.83 | 265 | -0.98 | 229 | -0.73 | 304 | -0.50 | 376 |
| Epha7     | -1.45 | 139 | -0.75 | 292 | -0.72 | 305 | -0.10 | 489 |
| Grk5      | -0.62 | 354 | -0.25 | 460 | -0.72 | 306 | -0.44 | 394 |
| Melk      | -0.33 | 431 | -0.83 | 267 | -0.72 | 307 | -0.79 | 279 |
| Prkaa1    | -0.32 | 436 | -0.97 | 231 | -0.71 | 308 | -1.89 | 100 |
| Ksr2      | -0.84 | 260 | -0.55 | 357 | -0.70 | 309 | -0.62 | 336 |
| Vrk2      | -1.25 | 165 | -0.63 | 328 | -0.70 | 310 | -4.95 | 7   |
| Pi4k2a    | -0.39 | 417 | -1.71 | 102 | -0.69 | 311 | -3.48 | 16  |
| Rps6kb1   | -0.58 | 363 | -0.92 | 240 | -0.69 | 312 | -1.55 | 144 |
| Camk2g    | -1.43 | 143 | -0.10 | 496 | -0.69 | 313 | -0.26 | 447 |
| Map3k15   | -3.17 | 28  | -2.35 | 48  | -0.68 | 314 | -1.67 | 131 |
| Pik3c2a   | -0.98 | 227 | -1.75 | 99  | -0.68 | 315 | -0.73 | 305 |
| Jak3      | -1.03 | 214 | -1.06 | 210 | -0.68 | 316 | -0.56 | 353 |
| Cit       | -1.00 | 221 | -0.10 | 500 | -0.68 | 317 | -0.24 | 455 |
| Mark2     | -0.88 | 250 | -1.47 | 131 | -0.67 | 318 | -1.40 | 166 |
| Cdk17     | -0.77 | 288 | -0.46 | 390 | -0.67 | 319 | -0.37 | 420 |
| Rnasel    | -0.23 | 461 | -0.08 | 501 | -0.67 | 320 | -0.08 | 498 |
| Trpm7     | -1.92 | 81  | -0.90 | 244 | -0.66 | 321 | -1.72 | 121 |
| Myo3a     | -0.44 | 394 | -1.98 | 70  | -0.66 | 322 | -0.45 | 390 |
| Lck       | -0.90 | 246 | -1.08 | 206 | -0.66 | 323 | -0.24 | 454 |
| ErbB4     | -0.32 | 437 | -0.19 | 477 | -0.65 | 324 | -0.70 | 314 |

|          |       |     |       |     |       |     |       |     |
|----------|-------|-----|-------|-----|-------|-----|-------|-----|
| BC030499 | -0.34 | 428 | -1.57 | 118 | -0.65 | 325 | -0.42 | 400 |
| Tie1     | -1.42 | 144 | -1.82 | 87  | -0.65 | 326 | -0.51 | 370 |
| Pak6     | -0.69 | 327 | -0.26 | 454 | -0.65 | 327 | -0.12 | 482 |
| Eif2ak2  | -0.74 | 300 | -0.71 | 300 | -0.65 | 328 | -1.05 | 229 |
| Cdk13    | -0.76 | 292 | -0.76 | 286 | -0.65 | 329 | -0.02 | 512 |
| Taok2    | -0.90 | 248 | -1.65 | 113 | -0.65 | 330 | -1.27 | 178 |
| Camkk2   | -0.15 | 485 | -0.25 | 455 | -0.65 | 331 | -0.09 | 496 |
| Ripk2    | -0.70 | 320 | -1.47 | 130 | -0.64 | 332 | -2.52 | 46  |
| Stk31    | -1.74 | 97  | -1.35 | 147 | -0.64 | 333 | -1.30 | 175 |
| Nrbp2    | -1.21 | 171 | -3.05 | 20  | -0.64 | 334 | -0.73 | 306 |
| Flt1     | -1.05 | 212 | -1.67 | 109 | -0.64 | 335 | -0.52 | 366 |
| Cdk11    | -2.05 | 75  | -2.67 | 35  | -0.63 | 336 | -0.67 | 322 |
| Vrk3     | -1.20 | 176 | -0.75 | 294 | -0.63 | 337 | -0.79 | 285 |
| Pak1     | -0.02 | 515 | -0.47 | 389 | -0.63 | 338 | -0.33 | 427 |
| Nuak2    | -0.18 | 475 | -0.37 | 423 | -0.63 | 339 | -1.68 | 129 |
| Adck1    | -0.47 | 386 | -0.10 | 499 | -0.62 | 340 | -0.54 | 357 |
| Ntrk3    | -1.24 | 168 | -1.51 | 127 | -0.62 | 341 | -0.38 | 415 |
| Mertk    | -0.78 | 279 | -1.84 | 84  | -0.62 | 342 | -1.17 | 203 |
| Ptk6     | -0.75 | 297 | -1.52 | 126 | -0.62 | 343 | -0.62 | 334 |
| Bmpr1a   | -0.33 | 432 | -2.00 | 68  | -0.61 | 344 | -0.35 | 421 |
| Pik3r2   | -1.05 | 209 | -1.90 | 77  | -0.61 | 345 | -1.00 | 237 |
| Grk1     | -1.21 | 173 | -0.89 | 248 | -0.60 | 346 | -0.54 | 359 |
| Prpf4b   | -3.86 | 14  | -2.78 | 30  | -0.59 | 347 | -3.03 | 26  |
| Abl2     | -0.01 | 516 | -0.51 | 374 | -0.59 | 348 | -0.41 | 405 |
| Ptk7     | -2.92 | 34  | -0.51 | 369 | -0.59 | 349 | -2.39 | 54  |
| Dmpk     | -0.63 | 347 | -1.70 | 104 | -0.59 | 350 | -0.28 | 441 |
| Dapk2    | -0.29 | 447 | -0.84 | 262 | -0.58 | 351 | -1.08 | 225 |
| Aurkc    | -0.26 | 454 | -1.86 | 81  | -0.58 | 352 | -0.71 | 311 |
| Lrrk1    | -0.63 | 348 | -1.27 | 166 | -0.58 | 353 | -1.13 | 216 |
| Phkg1    | -0.74 | 302 | -0.42 | 410 | -0.58 | 354 | -1.17 | 205 |
| Csnk2a1  | -1.86 | 86  | -1.55 | 122 | -0.58 | 355 | -1.69 | 127 |
| Acvrl1   | -0.71 | 316 | -0.41 | 411 | -0.57 | 356 | -0.13 | 481 |
| Cdk1     | -2.12 | 66  | -1.09 | 201 | -0.57 | 357 | -1.47 | 160 |
| Eef2k    | -0.62 | 351 | -0.21 | 468 | -0.57 | 358 | -1.33 | 171 |
| Irak3    | -0.19 | 468 | -1.02 | 221 | -0.57 | 359 | -0.26 | 448 |
| Pdik1l   | -1.12 | 190 | -0.52 | 365 | -0.56 | 360 | -0.18 | 468 |
| Dyrk4    | -0.83 | 267 | -1.84 | 85  | -0.56 | 361 | -1.13 | 214 |
| Cdk18    | -0.78 | 284 | -0.28 | 443 | -0.56 | 362 | -1.03 | 231 |
| Bmx      | -0.61 | 355 | -0.85 | 260 | -0.56 | 363 | -0.77 | 294 |
| Tgfb2    | -0.41 | 407 | -0.87 | 256 | -0.56 | 364 | -0.70 | 315 |
| Bcr      | -0.43 | 396 | -0.67 | 314 | -0.55 | 365 | -0.75 | 300 |
| Pik3c2g  | -1.58 | 113 | -0.60 | 339 | -0.55 | 366 | -0.54 | 358 |
| Camk1g   | -1.59 | 112 | -1.27 | 164 | -0.55 | 367 | -1.01 | 233 |
| Mylk2    | -1.30 | 156 | -0.61 | 337 | -0.55 | 368 | -1.98 | 91  |
| Srpk2    | -0.25 | 455 | -0.12 | 491 | -0.54 | 369 | -0.41 | 406 |
| Dyrk3    | -0.28 | 451 | -0.88 | 252 | -0.54 | 370 | -0.20 | 461 |
| Srpk1    | -0.05 | 510 | -0.83 | 263 | -0.54 | 371 | -0.17 | 471 |



|               |       |     |       |     |       |     |       |     |
|---------------|-------|-----|-------|-----|-------|-----|-------|-----|
| Tbck          | -0.53 | 370 | -0.18 | 481 | -0.53 | 372 | -0.08 | 499 |
| Ephb3         | -0.68 | 330 | -0.68 | 308 | -0.53 | 373 | -0.38 | 416 |
| Prkab1        | -1.37 | 146 | -0.62 | 334 | -0.53 | 374 | -0.67 | 321 |
| Stk38l        | -1.34 | 150 | -0.81 | 273 | -0.53 | 375 | -1.65 | 133 |
| Pik3cb        | -0.65 | 339 | -0.10 | 497 | -0.52 | 376 | -0.03 | 511 |
| Brsk2         | -1.08 | 199 | -0.44 | 401 | -0.52 | 377 | -0.39 | 413 |
| Rps6ka1       | -0.20 | 466 | -2.07 | 65  | -0.52 | 378 | -0.19 | 464 |
| Map2k7        | -0.42 | 403 | -0.44 | 399 | -0.52 | 379 | -0.27 | 444 |
| Stk10         | -1.20 | 177 | -0.69 | 305 | -0.51 | 380 | -0.39 | 412 |
| Pik3cd        | -0.10 | 497 | -0.27 | 448 | -0.51 | 381 | -0.18 | 470 |
| Map4k2        | -0.99 | 225 | -1.67 | 111 | -0.51 | 382 | -1.19 | 199 |
| Ntrk2         | -0.32 | 435 | -1.22 | 176 | -0.51 | 383 | -1.10 | 221 |
| Zak           | -1.09 | 196 | -0.21 | 469 | -0.50 | 384 | -1.87 | 105 |
| Igf1r         | -0.72 | 311 | -0.54 | 359 | -0.49 | 385 | -0.42 | 399 |
| Ephb2         | -0.42 | 402 | -0.27 | 446 | -0.49 | 386 | -0.54 | 362 |
| Fyn           | -0.71 | 317 | -0.18 | 478 | -0.49 | 387 | -1.15 | 208 |
| Pdgfra        | -1.23 | 169 | -0.18 | 480 | -0.48 | 388 | -0.76 | 296 |
| Csf1r         | -0.77 | 286 | -1.24 | 172 | -0.47 | 389 | -0.43 | 397 |
| Cdk19         | -0.53 | 369 | -0.04 | 511 | -0.47 | 390 | -0.29 | 439 |
| Mak           | -0.51 | 377 | -0.59 | 343 | -0.47 | 391 | -0.04 | 509 |
| Scyl3         | -0.18 | 471 | -0.45 | 396 | -0.47 | 392 | -0.64 | 328 |
| Csnk1g3       | -1.36 | 147 | -2.15 | 56  | -0.46 | 393 | -0.44 | 393 |
| Nlk           | -0.48 | 384 | -1.00 | 225 | -0.45 | 394 | -0.41 | 407 |
| Ick           | -0.31 | 439 | -0.33 | 431 | -0.45 | 395 | -0.71 | 309 |
| Map3k8        | -0.15 | 483 | -0.39 | 418 | -0.45 | 396 | -0.76 | 299 |
| Prkacb        | -1.00 | 220 | -0.58 | 351 | -0.45 | 397 | -0.87 | 260 |
| Map3k1        | -0.62 | 353 | -0.01 | 515 | -0.45 | 398 | -0.09 | 493 |
| Alpk1         | -0.29 | 448 | -0.51 | 376 | -0.45 | 399 | -0.19 | 465 |
| Camk2b        | -0.19 | 470 | -0.69 | 307 | -0.45 | 400 | -0.70 | 313 |
| Ephb1         | -0.71 | 314 | -0.76 | 290 | -0.45 | 401 | -0.83 | 271 |
| Cdc7          | -0.18 | 473 | -0.59 | 348 | -0.44 | 402 | -0.86 | 264 |
| Acvr2b        | -1.09 | 194 | -0.97 | 232 | -0.43 | 403 | -0.49 | 379 |
| Insrr         | -2.20 | 62  | -0.72 | 298 | -0.43 | 404 | -0.92 | 250 |
| Map3k4        | -0.82 | 270 | -0.56 | 353 | -0.43 | 405 | -0.19 | 463 |
| Hck           | -0.82 | 269 | -1.26 | 168 | -0.43 | 406 | -0.15 | 476 |
| Cdkl3         | -0.91 | 243 | -0.22 | 467 | -0.42 | 407 | -0.11 | 483 |
| Prkcb         | -0.73 | 305 | -0.06 | 503 | -0.41 | 408 | -0.70 | 312 |
| Dclk1         | -0.29 | 446 | -0.46 | 393 | -0.41 | 409 | -0.39 | 411 |
| Lyn           | -1.32 | 154 | -1.12 | 195 | -0.41 | 410 | -0.50 | 377 |
| Adrbk1        | -0.04 | 512 | -0.20 | 476 | -0.40 | 411 | 0.00  | 516 |
| Irak1         | -0.92 | 240 | -0.69 | 306 | -0.40 | 412 | -0.58 | 346 |
| 2610018G03Rik | -1.95 | 79  | -1.80 | 91  | -0.40 | 413 | -0.79 | 282 |
| Ttn           | -1.71 | 103 | -1.66 | 112 | -0.40 | 414 | -0.66 | 324 |
| Prkaa2        | -0.40 | 411 | -0.49 | 377 | -0.39 | 415 | -0.42 | 404 |
| Tyro3         | -0.24 | 458 | -0.46 | 391 | -0.39 | 416 | -0.42 | 401 |
| Ephb6         | -0.14 | 489 | -0.11 | 494 | -0.39 | 417 | -1.30 | 174 |
| Pnck          | -0.04 | 511 | -0.25 | 458 | -0.39 | 418 | -1.69 | 124 |

|          |       |     |       |     |       |     |       |     |
|----------|-------|-----|-------|-----|-------|-----|-------|-----|
| Pdk2     | -0.07 | 506 | -0.39 | 419 | -0.38 | 419 | -0.43 | 398 |
| Pak3     | -1.52 | 127 | -1.61 | 116 | -0.37 | 420 | -1.71 | 123 |
| Tlk1     | -0.64 | 344 | 0.00  | 517 | -0.37 | 421 | -0.35 | 423 |
| Taok3    | -0.43 | 398 | -0.34 | 430 | -0.37 | 422 | -0.52 | 368 |
| Epha8    | -0.78 | 280 | -0.88 | 253 | -0.37 | 423 | -0.57 | 349 |
| Cdk2     | -0.07 | 507 | -0.14 | 485 | -0.37 | 424 | -1.85 | 106 |
| Brsk1    | -0.17 | 477 | -0.26 | 453 | -0.37 | 425 | -0.57 | 348 |
| Tssk1    | -1.08 | 200 | -0.80 | 275 | -0.37 | 426 | -0.09 | 495 |
| Tyk2     | -0.33 | 430 | -1.19 | 179 | -0.36 | 427 | -1.36 | 169 |
| Pi4kb    | -1.02 | 216 | -0.03 | 513 | -0.36 | 428 | -0.77 | 292 |
| Camk1    | -1.50 | 131 | -1.11 | 197 | -0.36 | 429 | -0.48 | 384 |
| Sgk1     | -0.44 | 395 | -0.51 | 370 | -0.36 | 430 | -1.49 | 155 |
| Mapkapk3 | -0.41 | 408 | -0.37 | 422 | -0.36 | 431 | -0.33 | 429 |
| Map4k4   | -0.13 | 492 | -0.55 | 355 | -0.36 | 432 | -0.68 | 319 |
| Adck3    | -0.14 | 490 | -0.53 | 364 | -0.36 | 433 | -0.39 | 414 |
| Cdk15    | -0.21 | 464 | -0.83 | 264 | -0.35 | 434 | -1.87 | 104 |
| Rps6ka3  | -0.52 | 375 | -0.66 | 318 | -0.35 | 435 | -0.32 | 432 |
| Src      | -0.89 | 249 | -1.18 | 186 | -0.35 | 436 | -0.60 | 341 |
| Pik3c2b  | -0.18 | 472 | -0.73 | 296 | -0.34 | 437 | -0.25 | 451 |
| Tnk1     | -1.17 | 185 | -0.56 | 354 | -0.34 | 438 | -0.66 | 325 |
| Gsk3a    | -0.94 | 236 | -0.13 | 487 | -0.34 | 439 | -0.60 | 342 |
| Epha2    | -0.69 | 326 | -0.17 | 482 | -0.33 | 440 | -0.28 | 442 |
| Pim2     | -0.83 | 266 | -1.77 | 96  | -0.33 | 441 | -0.32 | 434 |
| Csnk1g2  | -0.84 | 259 | -1.18 | 187 | -0.32 | 442 | -0.50 | 374 |
| Prkd1    | -1.79 | 92  | -1.22 | 177 | -0.32 | 443 | -1.17 | 204 |
| Ros1     | -0.14 | 487 | -0.61 | 338 | -0.32 | 444 | -1.11 | 220 |
| Acvr1b   | -0.67 | 334 | -1.70 | 103 | -0.32 | 445 | -1.09 | 224 |
| Gsk3b    | -1.06 | 207 | -0.41 | 412 | -0.31 | 446 | -0.53 | 364 |
| Taok1    | -0.08 | 505 | -0.30 | 440 | -0.31 | 447 | -0.09 | 490 |
| Prkaca   | -1.30 | 158 | -0.20 | 474 | -0.30 | 448 | -1.27 | 176 |
| Stk32a   | -0.73 | 306 | -1.19 | 182 | -0.30 | 449 | -2.77 | 35  |
| Gak      | -0.83 | 261 | -1.22 | 175 | -0.29 | 450 | -0.32 | 435 |
| Pdk3     | -0.79 | 276 | -1.68 | 107 | -0.29 | 451 | -1.25 | 185 |
| Map3k12  | -0.36 | 425 | -0.05 | 508 | -0.29 | 452 | -0.24 | 453 |
| Pik3r5   | -1.17 | 186 | -0.76 | 288 | -0.29 | 453 | -0.77 | 293 |
| Map2k1   | -0.39 | 416 | -1.40 | 142 | -0.28 | 454 | -0.52 | 367 |
| Mylk3    | -0.22 | 463 | -1.68 | 108 | -0.27 | 455 | -0.83 | 272 |
| Chuk     | -0.64 | 343 | -0.54 | 360 | -0.27 | 456 | -0.29 | 440 |
| Peak1    | -0.31 | 441 | -0.33 | 433 | -0.27 | 457 | -0.02 | 514 |
| Mapk10   | -0.46 | 389 | -1.81 | 90  | -0.27 | 458 | -1.23 | 192 |
| Plk2     | -0.47 | 387 | -0.63 | 325 | -0.27 | 459 | -0.64 | 329 |
| Mast2    | -0.28 | 450 | -0.42 | 407 | -0.26 | 460 | -0.15 | 477 |
| Syk      | -0.15 | 486 | -1.54 | 123 | -0.26 | 461 | -1.01 | 234 |
| Stk25    | -0.24 | 459 | -0.62 | 333 | -0.25 | 462 | -0.79 | 283 |
| Ephb4    | -0.76 | 294 | -0.64 | 320 | -0.24 | 463 | -0.78 | 287 |
| Clk2     | -0.63 | 349 | -0.21 | 473 | -0.24 | 464 | -0.48 | 383 |
| Prkce    | -2.12 | 67  | -1.98 | 71  | -0.24 | 465 | -3.45 | 17  |

|          |       |     |       |     |       |     |       |     |
|----------|-------|-----|-------|-----|-------|-----|-------|-----|
| Prkg2    | -0.76 | 293 | -0.74 | 295 | -0.24 | 466 | -0.85 | 267 |
| Clk4     | -0.67 | 335 | -0.03 | 512 | -0.23 | 467 | -0.06 | 501 |
| Nek6     | -0.99 | 223 | -0.35 | 426 | -0.23 | 468 | -0.66 | 323 |
| Clk1     | -0.67 | 333 | -0.59 | 345 | -0.23 | 469 | -1.32 | 172 |
| Tssk2    | -0.98 | 226 | -1.09 | 202 | -0.23 | 470 | -0.92 | 248 |
| Acvr1    | -0.58 | 364 | -0.63 | 327 | -0.22 | 471 | -0.99 | 240 |
| Hspb8    | -1.00 | 219 | -2.23 | 53  | -0.22 | 472 | -1.84 | 107 |
| Ror1     | -0.41 | 405 | -0.47 | 386 | -0.21 | 473 | -0.09 | 492 |
| Abl1     | -0.77 | 287 | -1.09 | 200 | -0.21 | 474 | -1.44 | 162 |
| Stk39    | -0.47 | 385 | -1.16 | 192 | -0.21 | 475 | -0.61 | 337 |
| Mapk3    | -0.17 | 479 | 0.00  | 516 | -0.21 | 476 | -0.32 | 433 |
| Cdk5     | 0.00  | 517 | -0.40 | 415 | -0.20 | 477 | -0.34 | 425 |
| Camkv    | -0.40 | 413 | -0.76 | 289 | -0.20 | 478 | -0.05 | 504 |
| Csnk1a1  | -2.30 | 54  | -1.43 | 135 | -0.20 | 479 | -0.11 | 485 |
| Prkcq    | -0.10 | 499 | -1.24 | 171 | -0.20 | 480 | -0.05 | 503 |
| Dyrk1a   | -0.06 | 509 | -3.43 | 15  | -0.20 | 481 | 0.00  | 517 |
| Pik3r4   | -0.64 | 345 | -2.38 | 46  | -0.20 | 482 | -0.69 | 317 |
| Gucy2c   | -0.95 | 234 | -0.98 | 230 | -0.20 | 483 | -0.14 | 478 |
| Clk3     | -0.09 | 502 | -0.93 | 237 | -0.20 | 484 | -0.90 | 254 |
| Tgfbr1   | -0.51 | 376 | -0.93 | 238 | -0.19 | 485 | -0.11 | 484 |
| Nek4     | -0.80 | 273 | -0.32 | 435 | -0.19 | 486 | -1.58 | 142 |
| Camk2d   | -0.42 | 400 | -0.42 | 408 | -0.19 | 487 | -0.60 | 340 |
| Pak4     | -0.77 | 285 | -0.67 | 309 | -0.18 | 488 | -1.92 | 96  |
| Magi1    | -1.05 | 210 | -2.47 | 42  | -0.18 | 489 | -0.13 | 480 |
| Twf2     | -0.49 | 380 | -1.00 | 226 | -0.18 | 490 | -0.21 | 459 |
| Flt3     | -0.17 | 478 | -0.25 | 457 | -0.17 | 491 | -0.02 | 513 |
| Map3k3   | -1.05 | 211 | -1.56 | 121 | -0.17 | 492 | -0.51 | 371 |
| Map2k4   | -0.09 | 501 | -0.05 | 506 | -0.17 | 493 | -0.45 | 391 |
| Map4k5   | -0.08 | 503 | -0.85 | 259 | -0.16 | 494 | -0.39 | 410 |
| Alpk2    | -0.62 | 352 | -0.25 | 456 | -0.15 | 495 | -0.24 | 452 |
| Tssk3    | -0.22 | 462 | -0.60 | 340 | -0.15 | 496 | -0.25 | 450 |
| Tnk2     | -0.64 | 341 | -2.03 | 66  | -0.14 | 497 | -0.59 | 345 |
| Mapkapk2 | -0.53 | 371 | -0.27 | 447 | -0.14 | 498 | -0.97 | 243 |
| Prkx     | -1.14 | 188 | -0.85 | 261 | -0.14 | 499 | -0.99 | 241 |
| Stk4     | -2.04 | 76  | -1.63 | 114 | -0.14 | 500 | -1.09 | 222 |
| Slk      | -0.15 | 484 | -1.19 | 181 | -0.13 | 501 | -0.84 | 269 |
| Nek5     | -0.02 | 514 | -0.05 | 507 | -0.13 | 502 | -0.03 | 510 |
| Pkmyt1   | -0.25 | 457 | -0.61 | 336 | -0.13 | 503 | -0.11 | 486 |
| Atm      | -0.42 | 399 | -0.42 | 405 | -0.12 | 504 | -1.13 | 212 |
| Rps6ka2  | -0.16 | 481 | -0.55 | 356 | -0.12 | 505 | -1.48 | 159 |
| Ltk      | -0.10 | 498 | -0.70 | 303 | -0.11 | 506 | -0.94 | 245 |
| Oxsr1    | -0.43 | 397 | -0.28 | 444 | -0.11 | 507 | -0.45 | 392 |
| MLkl     | -0.83 | 268 | -1.33 | 150 | -0.10 | 508 | -0.04 | 508 |
| Rock1    | -0.49 | 382 | -0.11 | 495 | -0.10 | 509 | -0.42 | 402 |
| Npr1     | -0.33 | 429 | -0.04 | 510 | -0.08 | 510 | -1.23 | 188 |
| Grk4     | -0.45 | 392 | -0.78 | 280 | -0.07 | 511 | -0.26 | 446 |
| Dyrk1b   | -0.07 | 508 | -0.20 | 475 | -0.06 | 512 | -0.04 | 507 |

|          |       |     |       |     |       |     |       |     |
|----------|-------|-----|-------|-----|-------|-----|-------|-----|
| Prkcz    | -1.14 | 187 | -0.67 | 312 | -0.05 | 513 | -0.82 | 273 |
| Gucy2e   | -0.19 | 469 | -2.96 | 21  | -0.05 | 514 | -0.46 | 387 |
| Uhmk1    | -0.12 | 495 | -0.27 | 450 | -0.05 | 515 | -0.18 | 467 |
| Pik3r1   | -0.60 | 356 | -0.46 | 394 | -0.03 | 516 | -0.16 | 473 |
| Cdc42bpa | -0.16 | 480 | -0.16 | 483 | -0.01 | 517 | -0.31 | 437 |

**Table S3. Quality control metrics for the FDAome shRNA screens**

| reagent   | 393P            |       |       | 344P            |       |       |
|-----------|-----------------|-------|-------|-----------------|-------|-------|
|           | in-vivo (sv129) |       |       | in-vivo (sv129) |       |       |
|           | 1               | 2     | 3     | 1               | 2     | 3     |
| LUC_CONT  | -0.44           | -0.99 | 0.24  | -0.15           | 1.02  | 0.93  |
| LUC_CONT  | 0.58            | 1.24  | 0.95  | 2.21            | 0.42  | 0.68  |
| LUC_CONT  | 3.67            | 1.45  | 1.3   | 0.98            | 1.36  | 1.57  |
| LUC_CONT  | 0.63            | 0.24  | 1.16  | 1.86            | 0.96  | 0.91  |
| LUC_CONT  | 0.56            | 1.03  | -0.32 | 0.53            | 1.6   | 0.02  |
| LUC_CONT  | 1               | 0.52  | -0.3  | 3.2             | 0.36  | 1.44  |
| LUC_CONT  | 1.7             | -0.11 | 1.08  | 1.34            | 2.09  | 1.42  |
| LUC_CONT  | 0.42            | 0.38  | 0.29  | 1.5             | 1.36  | 1.5   |
| LUC_CONT  | 0.97            | 1.68  | 0.11  | 1.37            | -0.45 | 1.82  |
| LUC_CONT  | 0.63            | 0.86  | 1.44  | 0.98            | 0.56  | 0.68  |
| LUC_CONT  | 0.03            | 0.03  | -0.39 | 0.43            | 0.16  | 0.3   |
| LUC_CONT  | 0.5             | 0.6   | 0.46  | 0.35            | -0.07 | -0.07 |
| LUC_CONT  | -0.35           | 0.5   | 0.39  | 0.28            | 0.84  | 0.19  |
| LUC_CONT  | 0.08            | 0.1   | 0.61  | 1.55            | 0.47  | 0.87  |
| LUC_CONT  | 1.03            | 0.19  | 0.46  | 1.94            | 1.41  | 1.36  |
| LUC_CONT  | -0.46           | -1.33 | 0.1   | -0.56           | -0.42 | 0.53  |
| LUC_CONT  | -0.9            | -0.08 | -0.29 | -2.49           | -0.73 | -0.57 |
| LUC_CONT  | -1.48           | -1.77 | -0.53 | -3.62           | -1.35 | -1.95 |
| LUC_CONT  | 2.21            | -0.97 | 2.33  | -1.41           | -2.23 | -1.17 |
| LUC_CONT  | 1.51            | -1.22 | -0.81 | 0.83            | 0.56  | -0.12 |
| Rpl30_CON | -3.66           | -2.43 | -6.01 | -2.15           | -5.47 | -3.24 |
| Rpl30_CON | -2.5            | -2.2  | -2.32 | -2.16           | -1.2  | -2.24 |
| Rpl30_CON | -2.81           | -1.29 | -1.84 | -3.33           | -2.66 | -2.27 |
| Rpl30_CON | -3.06           | -2.16 | -0.55 | -1.52           | -4.67 | -4.42 |
| Rpl30_CON | -4.35           | -1.56 | -7.23 | -0.75           | -3.11 | -2.37 |
| Rpl30_CON | -3.06           | 0.62  | -2.12 | -2.08           | -1.62 | 3.62  |
| Rpl30_CON | 0.65            | -2.41 | -2.32 | -3.85           | -4.82 | -1.05 |
| Rpl30_CON | -1.19           | -2.45 | -1.86 | -3.07           | -2.75 | 4.05  |
| Rpl30_CON | -1.83           | -3.17 | -5.23 | -1.66           | -5.34 | -5.74 |
| Rpl30_CON | -2.83           | -2.35 | -1.37 | -2.67           | -1.37 | -1.43 |
| Rpl30_CON | -1.45           | -2.73 | -0.46 | -1.24           | -0.96 | -2.42 |
| Rpl30_CON | -2.74           | -0.93 | -1.62 | -1.71           | -1.22 | 0.67  |
| Rpl30_CON | -1.94           | -2.15 | -6.81 | -4.87           | -3.79 | -5.3  |
| Rpl30_CON | 0.23            | -1.86 | -0.83 | -2.45           | 0.16  | -4.01 |
| Rpl30_CON | -3.53           | -3.75 | 2.1   | 2.08            | 3.35  | 3.3   |
| Rpl30_CON | -2.34           | -1.22 | -1.02 | -0.08           | 1.23  | -0.08 |
| Rpl30_CON | -1.35           | -0.7  | -2.25 | -0.83           | -2.53 | 0.91  |
| Rpl30_CON | -2.4            | -1.98 | -1.94 | -4.46           | -0.8  | -4.82 |
| Rpl30_CON | -0.31           | -0.07 | -1.1  | -1.2            | -1.66 | -0.3  |
| Rpl30_CON | -1.82           | -2.41 | -0.65 | -1.66           | -0.59 | 0.17  |
| Psm1_CO   | -0.4            | 0.14  | -0.21 | 0.07            | -0.15 | 0.87  |
| Psm1_CO   | -0.48           | 0.12  | -0.08 | 0.14            | -0.8  | 0.57  |
| Psm1_CO   | -0.17           | 0.69  | 1.12  | 0.68            | -0.82 | 1.08  |

|          |       |       |       |       |       |       |
|----------|-------|-------|-------|-------|-------|-------|
| Psma1_CO | -0.4  | -0.13 | 0.39  | 0.32  | -0.91 | 0.45  |
| Psma1_CO | -0.64 | 1.2   | -0.55 | 0.14  | -0.77 | 0.69  |
| Psma1_CO | -1.87 | -1.15 | -2.89 | -3.15 | -4.68 | -2.21 |
| Psma1_CO | -0.79 | -2.69 | -2.16 | -3.74 | -3.26 | -2.09 |
| Psma1_CO | -2.09 | -1.83 | -2.47 | -1.06 | -4.2  | -0.41 |
| Psma1_CO | -1.21 | -1.04 | -1.45 | -3.77 | -3.23 | 0.28  |
| Psma1_CO | -0.13 | -3.03 | -1.85 | -3.59 | -0.89 | -0.42 |
| Psma1_CO | -5.79 | -1.62 | -2.03 | -1.25 | -1.41 | -1.49 |
| Psma1_CO | -2.39 | -0.92 | -3.94 | 2.18  | 1.05  | -1.39 |
| Psma1_CO | -3.55 | -1.32 | -1.94 | -1.8  | -2.79 | -1.31 |
| Psma1_CO | 0.38  | -2.77 | -2.26 | -0.4  | 0.05  | -1.54 |
| Psma1_CO | 3.07  | -2.07 | -0.04 | -0.66 | -0.29 | -1.57 |
| Psma1_CO | -2.24 | -2.29 | -2.23 | 0.19  | -1.96 | -2.18 |
| Psma1_CO | -1.99 | -3.39 | -5.29 | -2.93 | -0.8  | -0.4  |
| Psma1_CO | -0.88 | -3.44 | -3.52 | -1.28 | -2.67 | -0.79 |
| Psma1_CO | -3.08 | -1.86 | -1.86 | 1.67  | -1.34 | 0.48  |
| Psma1_CO | -1.98 | -2.77 | -4.74 | -0.5  | 1.74  | -0.22 |

**Table S4. Gene level dropout scores for each of the FDAome screens**

| gene   | 393P  | 393P  | 344P  | 344P  |
|--------|-------|-------|-------|-------|
|        | sv129 | sv129 | sv129 | sv129 |
|        | logP  | rank  | logP  | rank  |
| Pik3ca | -5.5  | 4     | -8.4  | 1     |
| Cdk4   | -3.2  | 16    | -7.8  | 2     |
| Myc    | -4.1  | 11    | -7.7  | 3     |
| Bcl2   | -2.9  | 18    | -6.3  | 4     |
| Prkcd  | -4.4  | 8     | -5.8  | 5     |
| Cdk7   | -0.7  | 110   | -5.4  | 6     |
| Ctnnb1 | -0.8  | 102   | -5.1  | 7     |
| Plk1   | -2.9  | 19    | -4.7  | 8     |
| Mtor   | -2.9  | 17    | -4.3  | 9     |
| Cdk6   | -2.0  | 32    | -4.2  | 10    |
| Psmc1  | -4.4  | 9     | -4.1  | 11    |
| Top2b  | -0.2  | 164   | -4.0  | 12    |
| Psmc1  | -10.1 | 1     | -3.9  | 13    |
| Rarb   | -0.8  | 96    | -3.9  | 14    |
| ErbB2  | -5.4  | 5     | -3.7  | 15    |
| Mcl1   | -1.4  | 56    | -3.3  | 16    |
| Esr1   | -4.5  | 7     | -3.2  | 17    |
| Birc5  | -0.9  | 88    | -3.1  | 18    |
| Insr   | -1.8  | 39    | -2.9  | 19    |
| Rac1   | -6.5  | 3     | -2.8  | 20    |
| Fgfr4  | -1.3  | 61    | -2.8  | 21    |
| Tec    | -1.1  | 69    | -2.7  | 22    |
| Top1   | -1.4  | 54    | -2.5  | 23    |
| Epha2  | -1.7  | 42    | -2.5  | 24    |
| Notch1 | -1.7  | 41    | -2.5  | 25    |
| Itk    | -0.8  | 100   | -2.5  | 26    |
| Rarg   | -1.1  | 73    | -2.5  | 27    |
| Ptpn6  | -1.1  | 68    | -2.4  | 28    |
| Raf1   | -8.7  | 2     | -2.4  | 29    |
| Stat3  | -4.8  | 6     | -2.4  | 30    |
| Axl    | -0.7  | 114   | -2.2  | 31    |
| Gsk3a  | -2.7  | 20    | -2.2  | 32    |
| Akt2   | -0.2  | 162   | -2.2  | 33    |
| Pim1   | -1.2  | 64    | -2.2  | 34    |
| Wee1   | -2.6  | 23    | -2.1  | 35    |
| Top2a  | -4.2  | 10    | -2.1  | 36    |
| Mapk3  | -0.3  | 160   | -2.1  | 37    |
| Parp3  | -1.2  | 65    | -2.1  | 38    |
| Prkcg  | -1.0  | 81    | -2.0  | 39    |
| Chek2  | -0.1  | 175   | -2.0  | 40    |
| Trim24 | -1.6  | 48    | -2.0  | 41    |
| Whsc1  | -1.2  | 63    | -2.0  | 42    |
| Cd274  | -0.4  | 152   | -1.9  | 43    |

|          |      |     |      |    |
|----------|------|-----|------|----|
| Tnfsf13b | -0.2 | 167 | -1.9 | 44 |
| Prkci    | -0.2 | 166 | -1.9 | 45 |
| Atr      | -1.8 | 36  | -1.9 | 46 |
| Jak1     | -0.7 | 112 | -1.9 | 47 |
| Aurkb    | -2.2 | 28  | -1.9 | 48 |
| Cdk9     | -1.3 | 60  | -1.8 | 49 |
| Mapk1    | -3.6 | 13  | -1.8 | 50 |
| Aurka    | -1.7 | 43  | -1.8 | 51 |
| Fgr      | -0.1 | 170 | -1.8 | 52 |
| Pak4     | -2.0 | 30  | -1.8 | 53 |
| Abl2     | -0.1 | 172 | -1.8 | 54 |
| Mapk7    | -1.9 | 35  | -1.7 | 55 |
| Mapk12   | -0.7 | 104 | -1.7 | 56 |
| Flt4     | -1.1 | 74  | -1.7 | 57 |
| Pik3cg   | -1.2 | 66  | -1.6 | 58 |
| Rps6kb1  | -0.7 | 107 | -1.6 | 59 |
| Hdac1    | -0.6 | 123 | -1.6 | 60 |
| Tyms     | -0.1 | 180 | -1.6 | 61 |
| Jak2     | -2.6 | 22  | -1.5 | 62 |
| Met      | -2.3 | 25  | -1.5 | 63 |
| Tyro3    | -1.1 | 76  | -1.5 | 64 |
| Fgfr1    | -0.9 | 91  | -1.5 | 65 |
| Ptgs2    | -1.1 | 70  | -1.5 | 66 |
| Rrm1     | -2.0 | 31  | -1.5 | 67 |
| Xpo1     | -1.6 | 50  | -1.5 | 68 |
| Ntrk1    | -1.4 | 55  | -1.5 | 69 |
| Egfr     | -1.5 | 51  | -1.4 | 70 |
| Chek1    | -0.2 | 163 | -1.4 | 71 |
| Cdk2     | -1.8 | 37  | -1.4 | 72 |
| Gls      | -0.4 | 144 | -1.4 | 73 |
| Parp1    | -0.7 | 113 | -1.4 | 74 |
| Esr2     | -1.1 | 77  | -1.4 | 75 |
| Mapk9    | -0.5 | 135 | -1.4 | 76 |
| Dot1l    | -1.1 | 72  | -1.3 | 77 |
| Il1b     | -0.7 | 116 | -1.3 | 78 |
| Ptk2     | -1.7 | 40  | -1.3 | 79 |
| Hdac3    | -0.5 | 141 | -1.3 | 80 |
| Eif4e    | -3.8 | 12  | -1.3 | 81 |
| Map3k14  | -0.6 | 130 | -1.3 | 82 |
| Ehmt2    | -1.9 | 34  | -1.2 | 83 |
| P4hb     | -0.8 | 103 | -1.2 | 84 |
| Mapk11   | -1.7 | 45  | -1.2 | 85 |
| Kdm1a    | -1.0 | 86  | -1.2 | 86 |
| Brd4     | -1.0 | 80  | -1.2 | 87 |
| Ppm1d    | -0.7 | 111 | -1.2 | 88 |
| Mapk8    | -1.3 | 59  | -1.1 | 89 |
| Abl1     | 0.0  | 187 | -1.1 | 90 |



|          |      |     |      |     |
|----------|------|-----|------|-----|
| Mapk14   | -0.4 | 153 | -1.1 | 91  |
| Nr2c2    | -0.5 | 139 | -1.0 | 92  |
| Pigf     | -0.4 | 146 | -1.0 | 93  |
| Lyn      | -0.6 | 128 | -1.0 | 94  |
| Rxb      | -1.8 | 38  | -1.0 | 95  |
| Flt1     | -1.2 | 67  | -1.0 | 96  |
| Ikbke    | -2.2 | 27  | -0.9 | 97  |
| Cdk1     | -1.0 | 83  | -0.9 | 98  |
| Prkdc    | -3.4 | 14  | -0.9 | 99  |
| Alk      | -0.7 | 106 | -0.9 | 100 |
| Irak4    | -0.4 | 149 | -0.9 | 101 |
| Hsp90aa1 | -1.4 | 53  | -0.9 | 102 |
| Smo      | -0.8 | 97  | -0.8 | 103 |
| Casp3    | -0.5 | 143 | -0.8 | 104 |
| Prkca    | -0.9 | 93  | -0.8 | 105 |
| Syk      | 0.0  | 188 | -0.8 | 106 |
| Pdgfra   | -0.5 | 134 | -0.8 | 107 |
| Src      | -0.8 | 99  | -0.8 | 108 |
| Vegfa    | -1.0 | 85  | -0.8 | 109 |
| Pgd      | -1.3 | 57  | -0.8 | 110 |
| Bcr      | -0.6 | 126 | -0.8 | 111 |
| Ezh2     | -0.9 | 89  | -0.8 | 112 |
| Map4     | -2.5 | 24  | -0.8 | 113 |
| Tubb4a   | -1.0 | 87  | -0.7 | 114 |
| Parp2    | -0.7 | 105 | -0.7 | 115 |
| Pdgfrb   | -0.6 | 118 | -0.7 | 116 |
| Map2k1   | -1.1 | 71  | -0.7 | 117 |
| Prkce    | -0.8 | 95  | -0.7 | 118 |
| Txn1     | -0.5 | 131 | -0.7 | 119 |
| Btk      | -1.7 | 46  | -0.7 | 120 |
| Il6      | -0.4 | 155 | -0.7 | 121 |
| Ccr5     | -1.0 | 79  | -0.7 | 122 |
| Frk      | -0.9 | 90  | -0.7 | 123 |
| Idh2     | -0.1 | 186 | -0.7 | 124 |
| Mapk13   | -0.4 | 148 | -0.7 | 125 |
| Tnfrsf8  | -0.3 | 159 | -0.7 | 126 |
| Prkch    | -0.7 | 108 | -0.7 | 127 |
| Ptch1    | -0.6 | 127 | -0.7 | 128 |
| Rock2    | -1.5 | 52  | -0.6 | 129 |
| Nfkb1    | -2.7 | 21  | -0.6 | 130 |
| Fyn      | -2.1 | 29  | -0.6 | 131 |
| Pdk1     | -0.2 | 165 | -0.5 | 132 |
| Gsk3b    | -1.7 | 44  | -0.5 | 133 |
| Fgfr2    | -1.0 | 78  | -0.5 | 134 |
| Map3k8   | -0.3 | 161 | -0.5 | 135 |
| Crebbp   | -0.1 | 179 | -0.5 | 136 |
| Kit      | -0.1 | 176 | -0.5 | 137 |

|         |      |     |      |     |
|---------|------|-----|------|-----|
| Ar      | -0.4 | 147 | -0.4 | 138 |
| Hdac6   | -0.6 | 117 | -0.4 | 139 |
| Mapt    | -0.7 | 109 | -0.4 | 140 |
| Xiap    | -0.6 | 121 | -0.4 | 141 |
| Atm     | -1.1 | 75  | -0.4 | 142 |
| Prkaa1  | -0.4 | 154 | -0.4 | 143 |
| Tnf     | -0.6 | 119 | -0.4 | 144 |
| Ret     | -0.1 | 177 | -0.4 | 145 |
| Idh1    | -0.5 | 132 | -0.4 | 146 |
| Hdac2   | -0.6 | 129 | -0.4 | 147 |
| Dhfr    | -3.4 | 15  | -0.4 | 148 |
| Drd2    | -1.6 | 49  | -0.4 | 149 |
| Il6ra   | -0.9 | 94  | -0.4 | 150 |
| Jak3    | -0.1 | 173 | -0.3 | 151 |
| Blk     | -0.8 | 101 | -0.3 | 152 |
| Pik3cd  | -1.3 | 58  | -0.3 | 153 |
| Map2    | -0.2 | 168 | -0.3 | 154 |
| Mknk1   | -0.3 | 156 | -0.3 | 155 |
| Nampt   | -0.6 | 125 | -0.3 | 156 |
| Lap3    | -1.0 | 82  | -0.3 | 157 |
| Lck     | 0.0  | 191 | -0.3 | 158 |
| Rxra    | -0.2 | 169 | -0.3 | 159 |
| Fgfr3   | -0.6 | 120 | -0.3 | 160 |
| Akt1    | -0.8 | 98  | -0.2 | 161 |
| Aurkc   | -0.5 | 133 | -0.2 | 162 |
| Prkcq   | -0.9 | 92  | -0.2 | 163 |
| Mdm2    | -0.5 | 138 | -0.2 | 164 |
| Tek     | -0.1 | 174 | -0.2 | 165 |
| Prkcb   | -0.7 | 115 | -0.2 | 166 |
| Braf    | -0.6 | 124 | -0.2 | 167 |
| Hdac8   | -0.5 | 136 | -0.2 | 168 |
| Ldha    | -1.6 | 47  | -0.2 | 169 |
| Prkcsh  | -1.9 | 33  | -0.2 | 170 |
| Rara    | -0.1 | 171 | -0.2 | 171 |
| Pim3    | -0.4 | 150 | -0.2 | 172 |
| Prkcz   | -0.1 | 182 | -0.2 | 173 |
| Akt3    | -0.5 | 137 | -0.1 | 174 |
| Tnfsf11 | -1.2 | 62  | -0.1 | 175 |
| Ms4a1   | -0.4 | 151 | -0.1 | 176 |
| Trpv1   | -0.5 | 140 | -0.1 | 177 |
| Ptpn11  | -2.3 | 26  | -0.1 | 178 |
| Nudt1   | -0.1 | 183 | -0.1 | 179 |
| Pik3cb  | -1.0 | 84  | -0.1 | 180 |
| Flt3    | -0.4 | 145 | -0.1 | 181 |
| Cd52    | -0.1 | 185 | -0.1 | 182 |
| Bmx     | 0.0  | 192 | -0.1 | 183 |
| Kdr     | -0.3 | 157 | -0.1 | 184 |

|        |      |     |      |     |
|--------|------|-----|------|-----|
| Tbk1   | -0.1 | 178 | -0.1 | 185 |
| Rock1  | -0.1 | 184 | -0.1 | 186 |
| Igf1r  | 0.0  | 189 | 0.0  | 187 |
| Map2k2 | -0.6 | 122 | 0.0  | 188 |
| Pak1   | -0.5 | 142 | 0.0  | 189 |
| Sgk3   | -0.1 | 181 | 0.0  | 190 |
| Porcn  | -0.3 | 158 | 0.0  | 191 |
| Pim2   | 0.0  | 190 | 0.0  | 192 |

**Table S5. List of antibodies**

| <b>Antibody</b>   | <b>Source</b>  | <b>Catalog</b> | <b>Dilution</b> |
|-------------------|----------------|----------------|-----------------|
| Zeb1              | GeneTex        | GTX105278      | 1:500           |
| E-cadherin        | BD Biosciences | 610181         | 1:1000          |
| pCDK4             | Abclonal       | AP0593         | 1:500           |
| CDK4              | Abcam          | ab137675       | 1:1000          |
| p21               | Santa cruz     | sc-6246        | 1:500           |
| pErk              | Cell signaling | 9101           | 1:1000          |
| Erk               | Cell signaling | 4695           | 1:1000          |
| pRBS780           | Cell signaling | 8180           | 1:1000          |
| pRBS807/811       | Cell signaling | 8516           | 1:1000          |
| RB                | abcam          | ab218526       | 1:1000          |
| pFOXM1            | abcam          | ab180710       | 1:1000          |
| FOXM1             | abcam          | ab207298       | 1:1000          |
| Actin             | ProteinTech    | 66009-1-Ig     | 1:10000         |
| Cleaved caspase-3 | Cell signaling | 9661           | 1:500           |
| Lamin A/C         | Cell signaling | 2032           | 1:1000          |
| Tubulin           | Cell signaling | 2148           | 1:1000          |

**Table S6. List of IP reagents**

| <b>Reagent</b>        | <b>Company</b> | <b>Catalog</b> |
|-----------------------|----------------|----------------|
| CDK4 antibody         | Santa cruz     | sc-56277       |
| p21 antibody          | invitrogen     | PA1-30399      |
| Clean blot IP reagent | thermofisher   | 21230          |
| normal mouse IgG      | santa cruz     | 2025           |
| normal rabbit IgG     | cell signaling | 2729           |
| dynabeads protein a   | thermofisher   | 10001D         |
| dynabeads protein g   | thermofisher   | 10003D         |

**Table S7. List of IHC antibodies**

| <b>Antibody</b> | <b>Company</b> | <b>Catalog</b> | <b>Dilution</b> |
|-----------------|----------------|----------------|-----------------|
| Zeb1            | Bethyl         | IHC-00419      | 1:200           |
| pRB             | Cell signaling | 8516           | 1:100           |
| pCDK4           | Invitrogen     | PA5-64482      | 1:250           |
| p21             | Novus          | NB100-1941     | 1:200           |
| pErk            | Cell signaling | 9101           | 1:250           |
| Ki67            | Abcam          | ab15580        | 1:1000          |

**Table S8. List of IF antibodies**

| <b>Antibody</b> | <b>Company</b> | <b>Catalog</b> | <b>Dilution</b> |
|-----------------|----------------|----------------|-----------------|
| pRB             | Cell signaling | 8516           | 1:100           |
| CDK4            | Abcam          | ab137675       | 1:200           |
| pCDK4           | Invitrogen     | PA5-64482      | 1:250           |
| p21             | Santa cruz     | sc-6246        | 1:200           |

**Table S9. qPCR primers**

| <b>Gene name</b> | <b>Primer sequence</b>  |
|------------------|-------------------------|
| ms-CDK4-F        | CATACCTGGACAAAGCACCTCC  |
| ms-CDK4-R        | GAATGTTCTCTGGCTTCAGGTCC |
| ms-p21-F         | GTGGCCTTGTCGCTGTCTT     |
| ms-p21-R         | GCGCTTGGAGTGATAGAAATCTG |
| ms-p27-F         | AGCAGTGTCCAGGGATGAGGAA  |
| ms-p27-R         | TTCTTGGGCGTCTGCTCCACAG  |
| ms-Zeb1-F        | ATGCTCTGAACGCGCAGC      |
| ms-Zeb1-R        | AATCGGCGATCTTTGAGAGCT   |
| hs-p21-F         | CAGCAGAGGAAGACCATGTG    |
| hs-p21-R         | GGCGTTTGGAGTGGTAGAAA    |
| hs-Zeb1-F        | GGCATACCTACTCAACTACGG   |
| hs-Zeb1-R        | TGGGCGGTGTAGAATCAGAGTC  |



**Table S10. List of CHIP reagents**

| <b>Gene name</b> | <b>Primer sequence</b>        |
|------------------|-------------------------------|
| GAPDH-F          | AGTGCCAGCCTCGTCCCGTAGACAAAATG |
| GAPDH-R          | AAGTGGGCCCCCGCCTTCTCCAT       |
| mir-200c-F       | AGGGCTCACCAGGAAGTGT           |
| mir-200c-R       | AGATCCCTGGCTCCCATC            |
| CDKN1A-cp-F      | TATTAGCTGGGCATGGTGGT          |
| CDKN1A-cp-R      | GCAGCCCTGGCTTTTTGTTT          |

| <b>Reagent</b>      | <b>Company</b> | <b>Catalog</b> |
|---------------------|----------------|----------------|
| ZEB1 antibody       | santa cruz     | H-102X         |
| normal rabbit IgG   | cell signaling | 2729           |
| dynabeads protein a | thermofisher   | 10001D         |

**Table S11. List of shRNA oligos**

| <b>Gene name</b> |
|------------------|
| sh-p21-oligo_1.1 |
| sh-p21-oligo_1.2 |
| shCdk4-oligo_1.1 |
| shCdk4-oligo_1.2 |
| shCdk4-oligo_2.1 |
| shCdk4-oligo_2.2 |

**Primer sequence**

CCGGGCCCAGACAACGGTGGAACTTTCTCGAGAAAGTTCCACCGTTCTCGGGCTTTTTG

AATTCAAAAAGCCCGAGAACGGTGGAACTTTCTCGAGAAAGTTCCACCGTTCTCGGGC

CCGGGCCCTCAAGAGTGTGAGAGTTCTCGAGAACTCTCACACTCTTGAGGGCTTTTT

AATTAAAAAGCCCTCAAGAGTGTGAGAGTTCTCGAGAACTCTCACACTCTTGAGGGC

CCGGCTGCCGTTGAGACCATTAAGCTCGAGCTTAATGGTCTCAACCGGCAGTTTTTG

AATTCAAAAAGTCCCGTTGAGACCATTAAGCTCGAGCTTAATGGTCTCAACCGGCAG
